# Supplementary material for: Benzylic C–H isocyanation/amine coupling sequence enabling high-throughput synthesis of pharmaceutically relevant ureas
Source: Royal Society of Chemistry journal article supplement (doi:10.1039/d1sc02049h), 2021-01-01
Supplement: d1sc02049h2.xlsx [file d1sc02049h2.xlsx]

## Sheet: Amine Set
Compound ID (Row-Column)	Chemical Structure	MFCD	SMILES Code	cLogP	Number of H-Bond Donors	Number of H-Bond Acceptors	Number of Rotatable Bonds	Molecular Weight (Da)	Topological Polar Surface Area (Å2)
a-1		MFCD18251611	O=C%11[C@@]%12(CC(C=CC(N)=C%13)=C%13C%12)C%14=CC=CN=C%14N%11	1.90241	2	3	0	251.289	68.01
a-2		MFCD20702077	O=S%15(C%16=CC(N)=CC=C%16OCC%15)=O	-0.192379	1	4	0	199.22	69.39
a-3		MFCD27992364	O=C(OC(C)(C)C)NC%17=C(N)C=C(OC(F)(F)F)C=C%17	3.48639	2	4	5	292.258	73.58
a-4		MFCD06738910	BrC%18=CNC%19=C%18C=CN=C%19	1.62309	1	1	0	197.035	28.68
a-5		MFCD09734296	O=C(C%20=CC(N)=CC=C%20)NCC%21=NC=CC=C%21	0.806909	2	3	3	227.267	68.01
a-6		MFCD24469761	O=C(OC(C)(C)C)NC%22=C(N)C=C(N%23C=CC=C%23)C=C%22	3.0168	2	3	4	273.336	69.28
a-7		MFCD27992395	ClC%24=CC(N)=C(NC(OC(C)(C)C)=O)C=C%24N(C)C	2.76737	2	4	4	285.77	67.59
a-8		MFCD08696361	NC%25=CC=CC=C%25N%26C(C)=CC(C)=N%26	1.56107	1	2	1	187.246	43.84
a-9		MFCD09971308	CCC%27=NOC(C%28=CC(N)=CC=C%28)=N%27	2.22524	1	3	2	189.218	64.94
a-10		MFCD11917896	FC%29=CC=C%30C(C=C(N)C=N%30)=C%29	1.44468	1	2	0	162.167	38.91
a-11		MFCD19689174	O=C(OCC%31=CC=CC=C%31)N(C%32)CCC%33=C%32C=C(N)C=N%33	1.50841	1	3	3	283.331	68.45
a-12		MFCD20921922	NC%34=CC=CC(N%35N=CC=N%35)=C%34	0.4198	1	3	1	160.18	56.73
b-1		MFCD26392734	O=C(NC1=C(NC(OC(C)(C)C)=O)C=CC=C1)C2=CC=C(N)C=C2	3.14717	3	4	5	327.384	93.45
b-2		MFCD00006907	NC%36=CC=CC%37=CN=CC=C%37%36	0.916124	1	2	0	144.177	38.91
b-3		MFCD09026344	CC(C)N%38N=CC%39=CC(N)=CC=C%39%38	1.36444	1	2	1	175.235	43.84
b-4		MFCD09999240	NC%40=CC=CC%41=CN=C(Cl)C=C%41%40	1.74035	1	2	0	178.62	38.91
b-5		MFCD21099990	BrC%42=CC(N)=CC(C%43CC%43)=C%42	2.69436	1	1	1	212.09	26.02
b-6		MFCD26401900	NC3=CC=C4C(C=CN=C4N(C(OC(C)(C)C)=O)C(OC(C)(C)C)=O)=C3	3.72379	1	5	5	359.426	94.75
b-7		MFCD03783538	CC(CC%44(C)C)(C)C%45=C%44C([N+]([O-])=O)=C(C)C(N)=C%45	3.77954	1	3	1	248.326	69.16
b-8		MFCD06797046	NC%46=CC=C(N%47CCS(CC%47)(=O)=O)C=C%46	-0.0872795	1	4	1	226.29	63.4
b-9		MFCD10039825	O=C(OCC)C%48=CC%49=CC(OC)=C(N)C=C%49N%48	1.3657	2	3	4	234.255	77.34
b-10		MFCD12407368	NC%50=CSC%51=C%50C=C(Cl)C=C%51	2.62439	1	1	0	183.65	26.02
b-11		MFCD20485524	O=S%52(N(CCCC%52)C%53=CC(F)=C(N)C=C%53)=O	0.441824	1	3	1	244.28	63.4
b-12		MFCD00034752	NC%54=CN=CC%55=CC=CC=C%55%54	0.916124	1	2	0	144.177	38.91
c-1		MFCD00179553	NC%56=C(C=NC=C%57)C%57=CC=C%56	0.916124	1	2	0	144.177	38.91
c-2		MFCD10697689	NC%58=C(C=C(N=C%58Cl)Cl)N	0.746165	2	3	0	178.02	64.93
c-3		MFCD12786502	NC(C=N%59)=CC=C%59OCCN%60CCCCC%60	1.23244	1	4	4	221.304	51.38
c-4		MFCD20528291	N#CC%61(CCCCC%61)C%62=CC=C(N)C=C%62	2.809	1	2	1	200.285	49.81
c-5		MFCD26523098	O=C1N(CCOC)N=NC2=C1C=C(N)C=C2	1.13676	1	5	3	220.232	80.28
c-6		MFCD11180854	BrC%63=CC=CC(C%64=NC=C(N)C=N%64)=C%63	2.3891	1	3	1	250.099	51.8
c-7		MFCD04114113	NC%65=CC=CN=C%65C%66=CC=CC=C%66	1.95972	1	2	1	170.215	38.91
c-8		MFCD09055390	NC%67=CC=CC=C%67N%68CCOC%68=O	0.693862	1	3	1	178.191	55.56
c-9		MFCD10758082	CCOC(C%69=C(C)N=C%70N%69C=CC=C%70N)=O	0.34228	1	3	3	219.244	69.62
c-10		MFCD14585542	NC%71=CC(F)=C(C%72CC%72)C(F)=C%71	2.21101	1	1	1	169.175	26.02
c-11		MFCD20651334	NC%73=CC=CC%74=C%73CCC%74C(O)=O	0.970742	2	3	1	177.203	63.32
c-12		MFCD22207064	NC%75=CC(B%76OC(C)(C)C(C)(C)O%76)=CC(C)=C%75	3.5844	1	3	1	233.12	44.48
d-1		MFCD26783748	NC%77=CC=CC(OC(C)(C)C(OCC)=O)=C%77	1.96886	1	3	5	223.272	61.55
d-2		MFCD16618895	NC%78=CN=C(C%79CCC%79)N=C%78	0.909446	1	3	1	149.197	51.8
d-3		MFCD01827720	CN(C)C(C%80=C(C)C(C(OC)=O)=C(N)S%80)=O	1.68809	1	3	3	242.29	72.63
d-4		MFCD08144821	NC%81=CC=C(OC(C)COC)C=C%81	1.35625	1	3	4	181.235	44.48
d-5		MFCD00007783	NC%82=CC=CC(OC)=C%82	0.986649	1	2	1	123.155	35.25
d-6		MFCD28741782	NC%83=C(Br)C(C(F)(F)F)=CC=C%83OC	2.63325	1	2	2	270.049	35.25
d-7		MFCD00000394	NC%84=CC(C(F)(F)F)=CC(C(F)(F)F)=C%84	2.90002	1	1	2	229.125	26.02
d-8		MFCD06212661	CC%85=C(OC)C=CC(CCN)=C%85	1.74343	1	2	3	165.236	35.25
d-9		MFCD09264437	O=C(OC(C)(C)C)N%86CCN(C%87CNC%87)CC%86	0.461273	1	3	3	241.335	44.81
d-10		MFCD11616037	C1(CCC23CCCN3)=C2C=C(N2CCOCC2)C=C1	2.29493	1	3	1	258.365	24.5
d-11		MFCD12198832	N[C@H]1C[C@]2([H])CCC[C@](N2C)([H])C1	0.371248	1	2	0	154.257	29.26
d-12		MFCD10700117	O=C(OC(C)(C)C)N(CC%90)CCC%90C%91CCCNC%91	1.8973	1	2	3	268.401	41.57
e-1		MFCD01646389	C12=CC=CC=C1OC1(CCNCC1)O2	2.05124	1	3	0	191.23	30.49
e-2		MFCD01313226	[H][C@]12[C@](CN[C@H](C(NC(C)(C)C)=O)C2)([H])CCCC1	1.89552	2	2	2	238.375	41.13
e-3		MFCD05864538	COC(C(OC)=C%94)=CC%95=C%94CCN(C%95)C%96CCNCC%96	1.28295	1	4	3	276.38	33.73
e-4		MFCD02094501	NCCCCCCCCCCNC(OC(C)(C)C)=O	3.31439	2	2	12	272.433	64.35
e-5		MFCD06213030	NCCCC(F)(F)F	0.888602	1	1	3	127.11	26.02
e-6		MFCD00023152	C1(CCCC2CCNCC2)=CC=CC=C1	3.41202	1	1	4	203.329	12.03
e-7		MFCD20527357	ClC%97=CN=C(C%98CNC%98)N=C%97	0.586541	1	3	1	169.61	37.81
e-8		MFCD22035710	O=C(OC(C)(C)C)N%99CC[C@@]1([H])[C@@](CNC1)([H])C%99	0.683102	1	2	2	226.32	41.57
e-9		MFCD02181068	O=C(OC(C)(C)C)NCC1CCCCN1	1.41237	2	2	4	214.309	50.36
e-10		MFCD05190089	C12=CC=CC=C1SC(C1NCCCC1)=N2	2.80731	1	2	1	218.32	24.92
e-11		MFCD08275919	O=C(NCC1CN(C2CCNCC2)C1)OC(C)(C)C	0.411302	2	3	5	269.389	53.6
e-12		MFCD02946795	NCC1(C2=CC=CC=C2)CCOCC1	1.30813	1	2	2	191.274	35.25
f-1		MFCD06653331	N1(CC2CCCN2)CCCCCC1	1.58627	1	2	2	182.311	15.27
f-2		MFCD09864209	CN(C)CC(C=C1)=CC=C1C1CCCN1	1.93856	1	2	3	204.317	15.27
f-3		MFCD12408610	NCC1(NC(OC(C)(C)C)=O)CCOCC1	-0.0453905	2	3	4	230.308	73.58
f-4		MFCD18073167	CC(NC(OC(C)(C)C)=O)C1CCNC1	0.984561	2	2	4	214.309	50.36
f-5		MFCD22083491	ClC1=CC=CC=C1N1CC2(CCNC2)CC1	2.4055	1	2	1	236.74	15.27
f-6		MFCD01569250	CC(C)(C)OC(N1C[C@@]2([H])NC[C@]1([H])C2)=O	0.562355	1	2	2	198.266	41.57
f-7		MFCD03043478	CC1=NOC(C)=C1CCN	0.0831523	1	2	2	140.186	52.05
f-8		MFCD00001349	CC1(C)[C@@]2([H])CC[C@@H](CN)[C@@]1(C2)[H]	1.74163	1	1	1	153.269	26.02
f-9		MFCD18260255	CC(N)C1=CC=C(F)C=N1	0.67428	1	2	1	140.161	38.91
f-10		MFCD22393927	O=C1C2(CCCNC2)CC2=CC=CC=C21	1.95152	1	2	0	201.269	29.1
f-11		MFCD07779083	NCC5(CCN(C(OC(C)(C)C)=O)CC5)C6=CC=CC=C6	2.2739	1	2	4	290.407	55.56
f-12		MFCD09894554	CC(CN)CC1=CC=CC=N1	0.85346	1	2	3	150.225	38.91
g-1		MFCD20684482	O=C1OCC2(CCNCC2)CN1	-0.467155	2	2	0	170.212	50.36
g-2		MFCD23144009	CC(C)(C)OC(N(CCOC)CCN)=O	0.246355	1	3	7	218.297	64.79
g-3		MFCD18375098	C1NCC2(OCCO2)C11CC1	0.498215	1	3	0	155.197	30.49
g-4		MFCD21099540	CC(C)(C)OC(NC1[C@]2([H])CNC[C@@]21[H])=O	0.116181	2	2	3	198.266	50.36
g-5		MFCD11112229	NC[C@H](NC(OC(C)(C)C)=O)C	0.48623	2	2	4	174.244	64.35
g-6		MFCD00192193	C/C(CC/C=C(C)/C)=C\CN	2.3955	1	1	4	153.269	26.02
g-7		MFCD12031501	O=C(OC(C)(C)C)NCCOCCN	0.0226792	2	3	7	204.27	73.58
g-8		MFCD14581196	O=C(OC(C)(C)C)N1CCC21CCNCC2	0.546276	1	2	2	226.32	41.57
g-9		MFCD19221442	CN1CC2CCCC(C1)N2	0.624141	1	2	0	140.23	15.27
g-10		MFCD21332851	O=C(OC(C)(C)C)N1C[C@@]2([H])[C@@](N2)([H])C1	0.502395	1	2	2	184.239	51.48
g-11		MFCD25509361	CC(C)(C)OC(N1CC[C@]2([H])[C@@]1([H])CNCC2)=O	1.08292	1	2	2	226.32	41.57
g-12		MFCD11100031	FC1=C(C2(CN)CCC2)C(F)=CC=C1	2.3969	1	1	2	197.229	26.02
h-1		MFCD02182967	O=C1C2=CC=CC=C2OC2(CCNCC2)N1	1.28323	2	3	0	218.256	50.36
h-2		MFCD00210016	COC[C@H]1N[C@H](COC)CC1	0.238502	1	3	4	159.229	30.49
h-3		MFCD00137757	[H][C@@]12[C@@](CCNC2)([H])CCCC1	1.73489	1	1	0	139.242	12.03
h-4		MFCD05863607	C1(CC2=CC(OCO3)=C3C=C2)CCCNC1	2.22407	1	3	2	219.284	30.49
h-5		MFCD11101394	CC(C)(C)OC(NC[C@H]1CCNC1)=O	0.567986	2	2	4	200.282	50.36
h-6		MFCD12177214	COC(C=CC=C1CN)=C1OC1CCCC1	2.13837	1	3	4	221.3	44.48
h-7		MFCD16045661	NCC1(CCS(CC1)(=O)=O)N1CCOCC1	-2.0615	1	5	2	248.34	72.63
h-8		MFCD20488777	C12=CC=CC=C1C1(CCNCC1)CO2	1.45849	1	2	0	189.258	21.26
h-9		MFCD01567991	O=S(N(C1CC1)C1CCNCC1)(C1=CC=C(Cl)C=C1)=O	1.74	1	3	3	314.83	49.41
h-10		MFCD09910041	BrC1=CC=C(C2(NC(N)=O)CCC2)C=C1	2.70167	1	1	1	226.117	26.02
h-11		MFCD00932349	O=C7C8=CC(C(NC[C@@H](C(O)=O)NS(C9=CC=C(C)C=C9)(=O)=O)=O)=NN8CCCN7CCC%10CCNCC%10	-2.19818	4	8	9	546.64	162.73
h-12		MFCD00145005	CCC(N(C1=CC=CC=C1)C1CCNCC1)=O	1.41932	1	2	3	232.327	32.34

## Sheet: Protected Urea Set
Compound ID (Substrate-Row-Column)	Chemical Structure	SMILES Code	cLogP	Number of H-Bond Donors	Number of H-Bond Acceptors	Number of Rotatable Bonds	Molecular Weight (Da)	Topological Polar Surface Area (Å2)
A-a-1		O=C%19[C@@]%20(CC(C=CC(NC(NC%21CC(C)(C)C%22=CC(C(C)(C)C)=CC(C(C)=O)=C%22%21)=O)=C%23)=C%23C%20)C%24=CC=CN=C%24N%19	5.81764	3	4	4	536.676	100.19
A-a-2		O=S%25(C%26=CC(NC(NC%27CC(C)(C)C%28=CC(C(C)(C)C)=CC(C(C)=O)=C%28%27)=O)=CC=C%26OCC%25)=O	3.72286	2	5	4	484.61	101.57
A-a-3		O=C(OC(C)(C)C)NC%29=C(NC(NC%30CC(C)(C)C%31=CC(C(C)(C)C)=CC(C(C)=O)=C%31%30)=O)C=C(OC(F)(F)F)C=C%29	7.40163	3	5	9	577.645	105.76
A-a-4		BrC%32=CN(C(NC%33CC(C)(C)C%34=CC(C(C)(C)C)=CC(C(C)=O)=C%34%33)=O)C%35=C%32C=CN=C%35	4.7915	1	3	3	482.422	63.99
A-a-5		O=C(C%36=CC(NC(NC%37CC(C)(C)C%38=CC(C(C)(C)C)=CC(C(C)=O)=C%38%37)=O)=CC=C%36)NCC%39=NC=CC=C%39	4.72214	3	4	7	512.654	100.19
A-a-6		O=C(OC(C)(C)C)NC%40=C(NC(NC%41CC(C)(C)C%42=CC(C(C)(C)C)=CC(C(C)=O)=C%42%41)=O)C=C(N%43C=CC=C%43)C=C%40	6.93203	3	4	8	558.723	101.46
A-a-7		ClC%44=CC(NC(NC%45CC(C)(C)C%46=CC(C(C)(C)C)=CC(C(C)=O)=C%46%45)=O)=C(NC(OC(C)(C)C)=O)C=C%44N(C)C	6.6826	3	5	8	571.16	99.77
A-a-8		CC%47=CC(C)=NN%47C%48=CC=CC=C%48NC(NC%49CC(C)(C)C%50=CC(C(C)(C)C)=CC(C(C)=O)=C%50%49)=O	5.4763	2	3	5	472.633	76.02
A-a-9		CCC%51=NOC(C%52=CC(NC(NC%53CC(C)(C)C%54=CC(C(C)(C)C)=CC(C(C)=O)=C%54%53)=O)=CC=C%52)=N%51	6.26952	2	4	6	474.605	97.12
A-a-10		FC%55=CC=C%56C(C=C(NC(NC%57CC(C)(C)C%58=CC(C(C)(C)C)=CC(C(C)=O)=C%58%57)=O)C=N%56)=C%55	5.35991	2	3	4	447.554	71.09
A-a-11		O=C(OCC%59=CC=CC=C%59)N(C%60)CCC%61=C%60C=C(NC(NC%62CC(C)(C)C%63=CC(C(C)(C)C)=CC(C(C)=O)=C%63%62)=O)C=N%61	5.42365	2	4	7	568.718	100.63
A-a-12		CC%64(C)C%65=CC(C(C)(C)C)=CC(C(C)=O)=C%65C(NC(NC%66=CC=CC(N%67N=CC=N%67)=C%66)=O)C%64	4.4284	2	4	5	445.567	88.91
A-b-1		O=C(NC1=C(NC(OC(C)(C)C)=O)C=CC=C1)C2=CC=C(NC(NC3CC(C)(C)C4=CC(C(C)(C)C)=CC(C(C)=O)=C43)=O)C=C2	7.0624	4	5	9	612.771	125.63
A-b-2		CC%68(C)C%69=CC(C(C)(C)C)=CC(C(C)=O)=C%69C(NC(NC%70=CC=CC%71=CN=CC=C%71%70)=O)C%68	4.83136	2	3	4	429.564	71.09
A-b-3		CC(C)N%72N=CC%73=CC(NC(NC%74CC(C)(C)C%75=CC(C(C)(C)C)=CC(C(C)=O)=C%75%74)=O)=CC=C%73%72	5.27967	2	3	5	460.622	76.02
A-b-4		ClC%76=NC=C(C=CC=C%77NC(NC%78CC(C)(C)C%79=CC(C(C)(C)C)=CC(C(C)=O)=C%79%78)=O)C%77=C%76	5.65558	2	3	4	464.01	71.09
A-b-5		BrC%80=CC(NC(NC%81CC(C)(C)C%82=CC(C(C)(C)C)=CC(C(C)=O)=C%82%81)=O)=CC(C%83CC%83)=C%80	6.60959	2	2	5	497.477	58.2
A-b-6		CC(C)(C)OC(N(C(OC(C)(C)C)=O)C5=NC=CC6=CC(NC(NC7CC(C)(C)C8=CC(C(C)(C)C)=CC(C(C)=O)=C87)=O)=CC=C65)=O	7.63903	2	6	9	644.813	126.93
A-b-7		CC(CC%84(C)C)(C)C%85=C%84C([N+]([O-])=O)=C(C)C(NC(NC%86CC(C)(C)C%87=CC(C(C)(C)C)=CC(C(C)=O)=C%87%86)=O)=C%85	7.69478	2	4	5	533.713	101.34
A-b-8		O=S(CCN%88C%89=CC=C(NC(NC%90CC(C)(C)C%91=CC(C(C)(C)C)=CC(C(C)=O)=C%91%90)=O)C=C%89)(CC%88)=O	3.82795	2	5	5	511.68	95.58
A-b-9		O=C(OCC)C%92=CC%93=CC(OC)=C(NC(NC%94CC(C)(C)C%95=CC(C(C)(C)C)=CC(C(C)=O)=C%95%94)=O)C=C%93N%92	5.28093	3	4	8	519.642	109.52
A-b-10		ClC%96=CC%97=C(SC=C%97NC(NC%98CC(C)(C)C%99=CC(C(C)(C)C)=CC(C(C)=O)=C%99%98)=O)C=C%96	6.53962	2	2	4	469.04	58.2
A-b-11		O=S1(N(CCCC1)C1=CC(F)=C(NC(NC2CC(C)(C)C3=CC(C(C)(C)C)=CC(C(C)=O)=C32)=O)C=C1)=O	4.35706	2	4	5	529.67	95.58
A-b-12		CC1(C)C2=CC(C(C)(C)C)=CC(C(C)=O)=C2C(NC(NC2=CN=CC3=CC=CC=C32)=O)C1	4.83136	2	3	4	429.564	71.09
A-c-1		CC1(C)C2=CC(C(C)(C)C)=CC(C(C)=O)=C2C(NC(NC2=C(C=NC=C3)C3=CC=C2)=O)C1	4.83136	2	3	4	429.564	71.09
A-c-2		NC1=C(C=C(N=C1Cl)Cl)NC(NC1CC(C)(C)C2=CC(C(C)(C)C)=CC(C(C)=O)=C21)=O	4.6614	3	4	4	463.4	97.11
A-c-3		CC1(C)C2=CC(C(C)(C)C)=CC(C(C)=O)=C2C(NC(NC(C=N2)=CC=C2OCCN2CCCCC2)=O)C1	5.14768	2	5	8	506.691	83.56
A-c-4		N#CC1(CCCCC1)C1=CC=C(NC(NC2CC(C)(C)C3=CC(C(C)(C)C)=CC(C(C)=O)=C32)=O)C=C1	6.72423	2	3	5	485.672	81.99
A-c-5		O=C1N(CCOC)N=NC2=C1C=C(NC(NC1CC(C)(C)C3=CC(C(C)(C)C)=CC(C(C)=O)=C31)=O)C=C2	5.05199	2	6	7	505.619	112.46
A-c-6		BrC1=CC=CC(C2=NC=C(NC(NC3CC(C)(C)C4=CC(C(C)(C)C)=CC(C(C)=O)=C43)=O)C=N2)=C1	6.43338	2	4	5	535.486	83.98
A-c-7		CC1(C)C2=CC(C(C)(C)C)=CC(C(C)=O)=C2C(NC(NC2=CC=CN=C2C2=CC=CC=C2)=O)C1	5.87496	2	3	5	455.602	71.09
A-c-8		O=C1OCCN1C1=CC=CC=C1NC(NC1CC(C)(C)C2=CC(C(C)(C)C)=CC(C(C)=O)=C21)=O	4.6091	2	4	5	463.578	87.74
A-c-9		CCOC(C1=C(C)N=C2N1C=CC=C2NC(NC1CC(C)(C)C2=CC(C(C)(C)C)=CC(C(C)=O)=C21)=O)=O	4.25751	2	4	7	504.631	101.8
A-c-10		FC1=CC(NC(NC2CC(C)(C)C3=CC(C(C)(C)C)=CC(C(C)=O)=C32)=O)=CC(F)=C1C1CC1	6.12624	2	2	5	454.562	58.2
A-c-11		O=C(O)C1CCC2=C1C=CC=C2NC(NC1CC(C)(C)C2=CC(C(C)(C)C)=CC(C(C)=O)=C21)=O	5.28998	3	4	5	462.59	95.5
A-c-12		CC1=CC(NC(NC2CC(C)(C)C3=CC(C(C)(C)C)=CC(C(C)=O)=C32)=O)=CC(B2OC(C)(C)C(C)(C)O2)=C1	7.593	2	4	5	518.51	76.66
A-d-1		CCOC(C(C)(C)OC1=CC(NC(NC2CC(C)(C)C3=CC(C(C)(C)C)=CC(C(C)=O)=C32)=O)=CC=C1)=O	5.8841	2	4	9	508.659	93.73
A-d-2		CC1(C)C2=CC(C(C)(C)C)=CC(C(C)=O)=C2C(NC(NC2=CN=C(C3CCC3)N=C2)=O)C1	4.95373	2	4	5	434.584	83.98
A-d-3		CN(C)C(C1=C(C)C(C(OC)=O)=C(NC(NC2CC(C)(C)C3=CC(C(C)(C)C)=CC(C(C)=O)=C32)=O)S1)=O	5.60332	2	4	7	527.68	104.81
A-d-4		CC(COC)OC1=CC=C(NC(NC2CC(C)(C)C3=CC(C(C)(C)C)=CC(C(C)=O)=C32)=O)C=C1	5.27148	2	4	8	466.622	76.66
A-d-5		COC1=CC(NC(NC2CC(C)(C)C3=CC(C(C)(C)C)=CC(C(C)=O)=C32)=O)=CC=C1	4.90188	2	3	5	408.542	67.43
A-d-6		BrC1=C(NC(NC2CC(C)(C)C3=CC(C(C)(C)C)=CC(C(C)=O)=C32)=O)C(OC)=CC=C1C(F)(F)F	6.54848	2	3	6	555.436	67.43
A-d-7		CC1(C)C2=CC(C(C)(C)C)=CC(C(C)=O)=C2C(NC(NC2=CC(C(F)(F)F)=CC(C(F)(F)F)=C2)=O)C1	6.81525	2	2	6	514.512	58.2
A-d-8		CC1=C(OC)C=CC(CCNC(NC2CC(C)(C)C3=CC(C(C)(C)C)=CC(C(C)=O)=C32)=O)=C1	5.41087	2	3	7	450.623	67.43
A-d-9		O=C(OC(C)(C)C)N1CCN(C2CN(C(NC3CC(C)(C)C4=CC(C(C)(C)C)=CC(C(C)=O)=C43)=O)C2)CC1	3.91981	1	4	6	526.722	82.19
A-d-10		CC1(C)C2=CC(C(C)(C)C)=CC(C(C)=O)=C2C(NC(N2CCCC32CCC2=C3C=C(N3CCOCC3)C=C2)=O)C1	5.75347	1	4	4	543.752	61.88
A-d-11		CN1[C@@]2([H])C[C@@H](NC(NC3CC(C)(C)C4=CC(C(C)(C)C)=CC(C(C)=O)=C43)=O)C[C@]1([H])CCC2	4.03869	2	3	4	439.644	61.44
A-d-12		O=C(OC(C)(C)C)N(CC1)CCC1C1CCCN(C(NC2CC(C)(C)C3=CC(C(C)(C)C)=CC(C(C)=O)=C32)=O)C1	5.35584	1	3	6	553.788	78.95
A-e-1		CC1(C)C2=CC(C(C)(C)C)=CC(C(C)=O)=C2C(NC(N(CC2)CCC32OC2=CC=CC=C2O3)=O)C1	5.50978	1	4	3	476.617	67.87
A-e-2		[H][C@]12[C@](CN(C(NC3CC(C)(C)C4=CC(C(C)(C)C)=CC(C(C)=O)=C43)=O)[C@H](C(NC(C)(C)C)=O)C2)([H])CCCC1	5.35406	2	3	5	523.762	78.51
A-e-3		COC(C(OC)=C1)=CC2=C1CCN(C2)C1CCN(C(NC2CC(C)(C)C3=CC(C(C)(C)C)=CC(C(C)=O)=C32)=O)CC1	4.74149	1	5	6	561.767	71.11
A-e-4		CC(C)(C)OC(NCCCCCCCCCCNC(NC1CC(C)(C)C2=CC(C(C)(C)C)=CC(C(C)=O)=C21)=O)=O	6.98183	3	3	16	557.82	96.53
A-e-5		CC1(C)C2=CC(C(C)(C)C)=CC(C(C)=O)=C2C(NC(NCCCC(F)(F)F)=O)C1	4.55605	2	2	7	412.497	58.2
A-e-6		CC1(C)C2=CC(C(C)(C)C)=CC(C(C)=O)=C2C(NC(N(CC2)CCC2CCCC2=CC=CC=C2)=O)C1	6.87056	1	2	7	488.716	49.41
A-e-7		ClC1=CN=C(C2CN(C(NC3CC(C)(C)C4=CC(C(C)(C)C)=CC(C(C)=O)=C43)=O)C2)N=C1	4.24103	1	4	4	455	75.19
A-e-8		O=C(OC(C)(C)C)N1CC[C@@]2([H])[C@@](CN(C(NC3CC(C)(C)C4=CC(C(C)(C)C)=CC(C(C)=O)=C43)=O)C2)([H])C1	4.14164	1	3	5	511.707	78.95
A-e-9		O=C(OC(C)(C)C)NCC1CCCCN1C(NC1CC(C)(C)C2=CC(C(C)(C)C)=CC(C(C)=O)=C21)=O	4.87091	2	3	7	499.696	87.74
A-e-10		CC1(C)C2=CC(C(C)(C)C)=CC(C(C)=O)=C2C(NC(N(CCCC2)C2C2=NC3=CC=CC=C3S2)=O)C1	6.26585	1	3	4	503.71	62.3
A-e-11		O=C(NCC1CN(C2CCN(C(NC3CC(C)(C)C4=CC(C(C)(C)C)=CC(C(C)=O)=C43)=O)CC2)C1)OC(C)(C)C	3.86984	2	4	8	554.776	90.98
A-e-12		CC1(C)C2=CC(C(C)(C)C)=CC(C(C)=O)=C2C(NC(NCC2(C3=CC=CC=C3)CCOCC2)=O)C1	4.97558	2	3	6	476.661	67.43
A-f-1		CC1(C)C2=CC(C(C)(C)C)=CC(C(C)=O)=C2C(NC(N2CCCC2CN2CCCCCC2)=O)C1	5.04481	1	3	5	467.698	52.65
A-f-2		CN(C)CC(C=C1)=CC=C1C1CCCN1C(NC1CC(C)(C)C2=CC(C(C)(C)C)=CC(C(C)=O)=C21)=O	5.3971	1	3	6	489.704	52.65
A-f-3		CC(C)(C)OC(NC1(CNC(NC2CC(C)(C)C3=CC(C(C)(C)C)=CC(C(C)=O)=C32)=O)CCOCC1)=O	3.62205	3	4	8	515.695	105.76
A-f-4		CC(NC(OC(C)(C)C)=O)C1CCN(C(NC2CC(C)(C)C3=CC(C(C)(C)C)=CC(C(C)=O)=C32)=O)C1	4.4431	2	3	7	499.696	87.74
A-f-5		ClC1=CC=CC=C1N1CC2(CCN(C(NC3CC(C)(C)C4=CC(C(C)(C)C)=CC(C(C)=O)=C43)=O)C2)CC1	5.86404	1	3	4	522.13	52.65
A-f-6		CC(C)(C)OC(N1C[C@@]2([H])N(C(NC3CC(C)(C)C4=CC(C(C)(C)C)=CC(C(C)=O)=C43)=O)C[C@]1([H])C2)=O	4.0209	1	3	5	483.653	78.95
A-f-7		CC1=NOC(C)=C1CCNC(NC1CC(C)(C)C2=CC(C(C)(C)C)=CC(C(C)=O)=C21)=O	3.7506	2	3	6	425.573	84.23
A-f-8		CC1(C)[C@@]2([H])CC[C@@H](CNC(NC3CC(C)(C)C4=CC(C(C)(C)C)=CC(C(C)=O)=C43)=O)[C@@]1(C2)[H]	5.40908	2	2	5	438.656	58.2
A-f-9		CC(NC(NC1CC(C)(C)C2=CC(C(C)(C)C)=CC(C(C)=O)=C21)=O)C1=CC=C(F)C=N1	4.34172	2	3	5	425.548	71.09
A-f-10		O=C1C2(CCCN(C(NC3CC(C)(C)C4=CC(C(C)(C)C)=CC(C(C)=O)=C43)=O)C2)CC2=CC=CC=C21	5.41006	1	3	3	486.656	66.48
A-f-11		CC(C)(C)OC(N(CC9)CCC9(CNC(NC%10CC(C)(C)C%11=CC(C(C)(C)C)=CC(C(C)=O)=C%11%10)=O)C%12=CC=CC=C%12)=O	5.94134	2	3	8	575.794	87.74
A-f-12		CC(CNC(NC1CC(C)(C)C2=CC(C(C)(C)C)=CC(C(C)=O)=C21)=O)CC1=CC=CC=N1	4.5209	2	3	7	435.612	71.09
A-g-1		O=C1OCC2(CCN(C(NC3CC(C)(C)C4=CC(C(C)(C)C)=CC(C(C)=O)=C43)=O)CC2)CN1	2.99138	2	3	3	455.599	87.74
A-g-2		CC(C)(C)OC(N(CCOC)CCNC(NC1CC(C)(C)C2=CC(C(C)(C)C)=CC(C(C)=O)=C21)=O)=O	3.9138	2	4	11	503.684	96.97
A-g-3		CC1(C)C2=CC(C(C)(C)C)=CC(C(C)=O)=C2C(NC(N2CC3(CC3)C3(OCCO3)C2)=O)C1	3.95675	1	4	3	440.584	67.87
A-g-4		CC(C)(C)OC(NC1[C@]2([H])CN(C(NC3CC(C)(C)C4=CC(C(C)(C)C)=CC(C(C)=O)=C43)=O)C[C@@]21[H])=O	3.57472	2	3	6	483.653	87.74
A-g-5		C[C@@H](NC(OC(C)(C)C)=O)CNC(NC1CC(C)(C)C2=CC(C(C)(C)C)=CC(C(C)=O)=C21)=O	4.15367	3	3	8	459.631	96.53
A-g-6		C/C(CC/C=C(C)/C)=C\CNC(NC1CC(C)(C)C2=CC(C(C)(C)C)=CC(C(C)=O)=C21)=O	6.06295	2	2	8	438.656	58.2
A-g-7		O=C(OC(C)(C)C)NCCOCCNC(NC1CC(C)(C)C2=CC(C(C)(C)C)=CC(C(C)=O)=C21)=O	3.69012	3	4	11	489.657	105.76
A-g-8		O=C(OC(C)(C)C)N1CCC21CCN(C(NC1CC(C)(C)C3=CC(C(C)(C)C)=CC(C(C)=O)=C31)=O)CC2	4.00482	1	3	5	511.707	78.95
A-g-9		CN1CC2CCCC(C1)N2C(NC1CC(C)(C)C2=CC(C(C)(C)C)=CC(C(C)=O)=C21)=O	4.08268	1	3	3	425.617	52.65
A-g-10		O=C(OC(C)(C)C)N1C[C@@]2([H])[C@@](N2C(NC2CC(C)(C)C3=CC(C(C)(C)C)=CC(C(C)=O)=C32)=O)([H])C1	3.96094	1	3	5	469.626	78.72
A-g-11		CC(C)(C)OC(N1CC[C@]2([H])[C@@]1([H])CN(C(NC1CC(C)(C)C3=CC(C(C)(C)C)=CC(C(C)=O)=C31)=O)CC2)=O	4.54146	1	3	5	511.707	78.95
A-g-12		FC1=C(C2(CNC(NC3CC(C)(C)C4=CC(C(C)(C)C)=CC(C(C)=O)=C43)=O)CCC2)C(F)=CC=C1	6.06434	2	2	6	482.616	58.2
A-h-1		O=C1C2=CC=CC=C2OC2(CCN(C(NC3CC(C)(C)C4=CC(C(C)(C)C)=CC(C(C)=O)=C43)=O)CC2)N1	4.74177	2	4	3	503.643	87.74
A-h-2		COC[C@H]1N(C(NC2CC(C)(C)C3=CC(C(C)(C)C)=CC(C(C)=O)=C32)=O)[C@H](COC)CC1	3.69704	1	4	7	444.616	67.87
A-h-3		[H][C@@]12[C@@](CCN(C(NC3CC(C)(C)C4=CC(C(C)(C)C)=CC(C(C)=O)=C43)=O)C2)([H])CCCC1	5.19343	1	2	3	424.629	49.41
A-h-4		CC1(C)C2=CC(C(C)(C)C)=CC(C(C)=O)=C2C(NC(N2CC(CC3=CC(OCO4)=C4C=C3)CCC2)=O)C1	5.68261	1	4	5	504.671	67.87
A-h-5		CC(C)(C)OC(NC[C@H]1CCN(C(NC2CC(C)(C)C3=CC(C(C)(C)C)=CC(C(C)=O)=C32)=O)C1)=O	4.02653	2	3	7	485.669	87.74
A-h-6		COC(C=CC=C1CNC(NC2CC(C)(C)C3=CC(C(C)(C)C)=CC(C(C)=O)=C32)=O)=C1OC1CCCC1	5.80582	2	4	8	506.687	76.66
A-h-7		O=S(CCC1(CNC(NC2CC(C)(C)C3=CC(C(C)(C)C)=CC(C(C)=O)=C32)=O)N2CCOCC2)(CC1)=O	1.60594	2	6	6	533.73	104.81
A-h-8		CC1(C)C2=CC(C(C)(C)C)=CC(C(C)=O)=C2C(NC(N(CC2)CCC32COC2=CC=CC=C23)=O)C1	4.91703	1	3	3	474.645	58.64
A-h-9		O=S(N(C1CC1)C1CCN(C(NC2CC(C)(C)C3=CC(C(C)(C)C)=CC(C(C)=O)=C32)=O)CC1)(C1=CC=C(Cl)C=C1)=O	5.19854	1	4	6	600.22	86.79
A-h-10		BrC1=CC=C(C2(NC(NC3CC(C)(C)C4=CC(C(C)(C)C)=CC(C(C)=O)=C43)=O)CCC2)C=C1	6.36911	2	2	5	511.504	58.2
A-h-11		O=C%13C%14=CC(C(NC[C@@H](C(O)=O)NS(C%15=CC=C(C)C=C%15)(=O)=O)=O)=NN%14CCCN%13CCC%16CCN(C(NC%17CC(C)(C)C%18=CC(C(C)(C)C)=CC(C(C)=O)=C%18%17)=O)CC%16	3.732	4	9	12	832.03	200.11
A-h-12		CCC(N(C1=CC=CC=C1)C1CCN(C(NC2CC(C)(C)C3=CC(C(C)(C)C)=CC(C(C)=O)=C32)=O)CC1)=O	4.87786	1	3	6	517.714	69.72
B-a-1		O=C%13[C@@]%14(CC(C=CC(NC(NC(C%15=C(C)C=CC(Br)=C%15)C(S%16)=CC=C%16C%17=CC=C(F)C=C%17)=O)=C%18)=C%18C%14)C%19=CC=CN=C%19N%13	8.34958	3	3	5	653.57	83.12
B-a-2		O=S%56(C%57=CC(NC(NC(C%58=C(C)C=CC(Br)=C%58)C(S%59)=CC=C%59C%60=CC=C(F)C=C%60)=O)=CC=C%57OCC%56)=O	6.25479	2	4	5	601.51	84.5
B-a-3		O=C(OC(C)(C)C)NC%92=C(NC(NC(C%93=C(C)C=CC(Br)=C%93)C(S%94)=CC=C%94C%95=CC=C(F)C=C%95)=O)C=C(OC(F)(F)F)C=C%92	9.93356	3	4	10	694.54	88.69
B-a-4		BrC1=CN(C(NC(C2=C(C)C=CC(Br)=C2)C(S2)=CC=C2C2=CC=C(F)C=C2)=O)C2=C1C=CN=C2	7.32343	1	2	4	599.32	46.92
B-a-5		O=C(C1=CC(NC(NC(C2=C(C)C=CC(Br)=C2)C(S2)=CC=C2C2=CC=C(F)C=C2)=O)=CC=C1)NCC1=NC=CC=C1	7.25408	3	3	8	629.55	83.12
B-a-6		O=C(OC(C)(C)C)NC1=C(NC(NC(C2=C(C)C=CC(Br)=C2)C(S2)=CC=C2C2=CC=C(F)C=C2)=O)C=C(N2C=CC=C2)C=C1	9.46397	3	3	9	675.62	84.39
B-a-7		ClC1=CC(NC(NC(C2=C(C)C=CC(Br)=C2)C(S2)=CC=C2C2=CC=C(F)C=C2)=O)=C(NC(OC(C)(C)C)=O)C=C1N(C)C	9.21454	3	4	9	688.05	82.7
B-a-8		CC1=CC(C)=NN1C1=CC=CC=C1NC(NC(C1=C(C)C=CC(Br)=C1)C(S1)=CC=C1C1=CC=C(F)C=C1)=O	8.00824	2	2	6	589.53	58.95
B-a-9		CCC1=NOC(C2=CC(NC(NC(C3=C(C)C=CC(Br)=C3)C(S3)=CC=C3C3=CC=C(F)C=C3)=O)=CC=C2)=N1	8.70225	2	3	7	591.5	80.05
B-a-10		FC1=CC=C2C(C=C(NC(NC(C3=C(C)C=CC(Br)=C3)C(S3)=CC=C3C3=CC=C(F)C=C3)=O)C=N2)=C1	7.89185	2	2	5	564.45	54.02
B-a-11		O=C(OCC1=CC=CC=C1)N(C1)CCC2=C1C=C(NC(NC(C1=C(C)C=CC(Br)=C1)C(S1)=CC=C1C1=CC=C(F)C=C1)=O)C=N2	7.95558	2	3	8	685.61	83.56
B-a-12		O=C(NC1=CC=CC(N2N=CC=N2)=C1)NC(C1=C(C)C=CC(Br)=C1)C(S1)=CC=C1C1=CC=C(F)C=C1	6.7791	2	3	6	562.46	71.84
B-b-1		O=C(NC%20=C(NC(OC(C)(C)C)=O)C=CC=C%20)C%21=CC=C(NC(NC(C%22=C(C)C=CC(Br)=C%22)C(S%23)=CC=C%23C%24=CC=C(F)C=C%24)=O)C=C%21	9.59433	4	4	10	729.67	108.56
B-b-2		O=C(NC%61=CC=CC%62=CN=CC=C%62%61)NC(C%63=C(C)C=CC(Br)=C%63)C(S%64)=CC=C%64C%65=CC=C(F)C=C%65	7.36329	2	2	5	546.46	54.02
B-b-3		CC(C)N%96N=CC%97=CC(NC(NC(C%98=C(C)C=CC(Br)=C%98)C(S%99)=CC=C%99C1=CC=C(F)C=C1)=O)=CC=C%97%96	7.81161	2	2	6	577.52	58.95
B-b-4		ClC1=NC=C(C=CC=C2NC(NC(C3=C(C)C=CC(Br)=C3)C(S3)=CC=C3C3=CC=C(F)C=C3)=O)C2=C1	8.18751	2	2	5	580.9	54.02
B-b-5		BrC1=CC(NC(NC(C2=C(C)C=CC(Br)=C2)C(S2)=CC=C2C2=CC=C(F)C=C2)=O)=CC(C2CC2)=C1	9.14152	2	1	6	614.37	41.13
B-b-6		CC(C)(C)OC(N(C(OC(C)(C)C)=O)C1=NC=CC2=CC(NC(NC(C3=C(C)C=CC(Br)=C3)C(S4)=CC=C4C5=CC=C(F)C=C5)=O)=CC=C21)=O	10.171	2	5	10	761.71	109.86
B-b-7		CC(CC1(C)C)(C)C2=C1C([N+]([O-])=O)=C(C)C(NC(NC(C1=CC=C(C3=CC=C(C=C3)F)S1)C(C=C(C=C1)Br)=C1C)=O)=C2	10.2267	2	3	6	650.61	84.27
B-b-8		O=S(CCN1C2=CC=C(NC(NC(C3=C(C)C=CC(Br)=C3)C(S3)=CC=C3C3=CC=C(F)C=C3)=O)C=C2)(CC1)=O	6.35989	2	4	6	628.58	78.51
B-b-9		O=C(OCC)C1=CC2=CC(OC)=C(NC(NC(C3=C(C)C=CC(Br)=C3)C(S3)=CC=C3C3=CC=C(F)C=C3)=O)C=C2N1	7.81287	3	3	9	636.54	92.45
B-b-10		ClC1=CC2=C(SC=C2NC(NC(C2=C(C)C=CC(Br)=C2)C(S2)=CC=C2C2=CC=C(F)C=C2)=O)C=C1	9.07156	2	1	5	585.93	41.13
B-b-11		O=S1(N(CCCC1)C1=CC(F)=C(NC(NC(C2=C(C)C=CC(Br)=C2)C(S2)=CC=C2C2=CC=C(F)C=C2)=O)C=C1)=O	6.88899	2	3	6	646.57	78.51
B-b-12		O=C(NC1=CN=CC2=CC=CC=C21)NC(C1=C(C)C=CC(Br)=C1)C(S1)=CC=C1C1=CC=C(F)C=C1	7.36329	2	2	5	546.46	54.02
B-c-1		O=C(NC%25=C(C=NC=C%26)C%26=CC=C%25)NC(C%27=C(C)C=CC(Br)=C%27)C(S%28)=CC=C%28C%29=CC=C(F)C=C%29	7.36329	2	2	5	546.46	54.02
B-c-2		ClC%66=NC(Cl)=CC(NC(NC(C%67=C(C)C=CC(Br)=C%67)C(S%68)=CC=C%68C%69=CC=C(F)C=C%69)=O)=C%66N	7.19333	3	3	5	580.3	80.04
B-c-3		O=C(NC(C=N1)=CC=C1OCCN1CCCCC1)NC(C1=C(C)C=CC(Br)=C1)C(S1)=CC=C1C1=CC=C(F)C=C1	7.67961	2	4	9	623.59	66.49
B-c-4		N#CC1(CCCCC1)C1=CC=C(NC(NC(C2=C(C)C=CC(Br)=C2)C(S2)=CC=C2C2=CC=C(F)C=C2)=O)C=C1	9.25617	2	2	6	602.57	64.92
B-c-5		O=C1N(CCOC)N=NC2=C1C=C(NC(NC(C1=C(C)C=CC(Br)=C1)C(S1)=CC=C1C1=CC=C(F)C=C1)=O)C=C2	7.58393	2	5	8	622.51	95.39
B-c-6		BrC1=CC=CC(C2=NC=C(NC(NC(C3=C(C)C=CC(Br)=C3)C(S3)=CC=C3C3=CC=C(F)C=C3)=O)C=N2)=C1	8.86611	2	3	6	652.38	66.91
B-c-7		O=C(NC1=CC=CN=C1C1=CC=CC=C1)NC(C1=C(C)C=CC(Br)=C1)C(S1)=CC=C1C1=CC=C(F)C=C1	8.40689	2	2	6	572.5	54.02
B-c-8		O=C1OCCN1C1=CC=CC=C1NC(NC(C1=C(C)C=CC(Br)=C1)C(S1)=CC=C1C1=CC=C(F)C=C1)=O	7.14103	2	3	6	580.47	70.67
B-c-9		CCOC(C1=C(C)N=C2N1C=CC=C2NC(NC(C1=C(C)C=CC(Br)=C1)C(S1)=CC=C1C1=CC=C(F)C=C1)=O)=O	6.78945	2	3	8	621.53	84.73
B-c-10		FC1=CC(NC(NC(C2=C(C)C=CC(Br)=C2)C(S2)=CC=C2C2=CC=C(F)C=C2)=O)=CC(F)=C1C1CC1	8.65818	2	1	6	571.46	41.13
B-c-11		O=C(O)C1CCC2=C1C=CC=C2NC(NC(C1=C(C)C=CC(Br)=C1)C(S1)=CC=C1C1=CC=C(F)C=C1)=O	7.82192	3	3	6	579.48	78.43
B-c-12		CC1=CC(NC(NC(C2=C(C)C=CC(Br)=C2)C(S2)=CC=C2C2=CC=C(F)C=C2)=O)=CC(B2OC(C)(C)C(C)(C)O2)=C1	9.9437	2	3	6	635.4	59.59
B-d-1		CCOC(C(C)(C)OC%30=CC(NC(NC(C%31=C(C)C=CC(Br)=C%31)C(S%32)=CC=C%32C%33=CC=C(F)C=C%33)=O)=CC=C%30)=O	8.41603	2	3	10	625.55	76.66
B-d-2		O=C(NC%70=CN=C(C%71CCC%71)N=C%70)NC(C%72=C(C)C=CC(Br)=C%72)C(S%73)=CC=C%73C%74=CC=C(F)C=C%74	7.38646	2	3	6	551.48	66.91
B-d-3		CN(C)C(C1=C(C)C(C(OC)=O)=C(NC(NC(C2=CC=C(C3=CC=C(C=C3)F)S2)C(C=C(C=C2)Br)=C2C)=O)S1)=O	8.13526	2	3	8	644.57	87.74
B-d-4		CC(COC)OC1=CC=C(NC(NC(C2=C(C)C=CC(Br)=C2)C(S2)=CC=C2C2=CC=C(F)C=C2)=O)C=C1	7.80342	2	3	9	583.52	59.59
B-d-5		COC1=CC(NC(NC(C2=C(C)C=CC(Br)=C2)C(S2)=CC=C2C2=CC=C(F)C=C2)=O)=CC=C1	7.43382	2	2	6	525.44	50.36
B-d-6		BrC1=C(NC(NC(C2=C(C)C=CC(Br)=C2)C(S2)=CC=C2C2=CC=C(F)C=C2)=O)C(OC)=CC=C1C(F)(F)F	9.08042	2	2	7	672.33	50.36
B-d-7		O=C(NC1=CC(C(F)(F)F)=CC(C(F)(F)F)=C1)NC(C1=C(C)C=CC(Br)=C1)C(S1)=CC=C1C1=CC=C(F)C=C1	9.34719	2	1	7	631.41	41.13
B-d-8		CC1=C(OC)C=CC(CCNC(NC(C2=C(C)C=CC(Br)=C2)C(S2)=CC=C2C2=CC=C(F)C=C2)=O)=C1	7.9428	2	2	8	567.52	50.36
B-d-9		O=C(OC(C)(C)C)N1CCN(C2CN(C(NC(C3=C(C)C=CC(Br)=C3)C(S3)=CC=C3C3=CC=C(F)C=C3)=O)C2)CC1	6.45175	1	3	7	643.62	65.12
B-d-10		O=C(N1CCCC21CCC1=C2C=C(N2CCOCC2)C=C1)NC(C1=C(C)C=CC(Br)=C1)C(S1)=CC=C1C1=CC=C(F)C=C1	8.2854	1	3	5	660.65	44.81
B-d-11		CN1[C@@]2([H])C[C@@H](NC(NC(C3=C(C)C=CC(Br)=C3)C(S3)=CC=C3C3=CC=C(F)C=C3)=O)C[C@]1([H])CCC2	6.57063	2	2	5	556.54	44.37
B-d-12		O=C(OC(C)(C)C)N(CC1)CCC1C1CCCN(C(NC(C2=C(C)C=CC(Br)=C2)C(S2)=CC=C2C2=CC=C(F)C=C2)=O)C1	7.88777	1	2	7	670.68	61.88
B-e-1		O=C(N(CC%34)CCC%35%34OC%36=CC=CC=C%36O%35)NC(C%37=C(C)C=CC(Br)=C%37)C(S%38)=CC=C%38C%39=CC=C(F)C=C%39	8.04172	1	3	4	593.51	50.8
B-e-2		[H][C@]12[C@](CN(C(NC(C3=C(C)C=CC(Br)=C3)C(S4)=CC=C4C5=CC=C(F)C=C5)=O)[C@H](C(NC(C)(C)C)=O)C2)([H])CCCC1	7.886	2	2	6	640.66	61.44
B-e-3		COC(C(OC)=C1)=CC2=C1CCN(C2)C1CCN(C(NC(C2=C(C)C=CC(Br)=C2)C(S2)=CC=C2C2=CC=C(F)C=C2)=O)CC1	7.27342	1	4	7	678.66	54.04
B-e-4		CC(C)(C)OC(NCCCCCCCCCCNC(NC(C1=C(C)C=CC(Br)=C1)C(S1)=CC=C1C1=CC=C(F)C=C1)=O)=O	9.51377	3	2	17	674.71	79.46
B-e-5		O=C(NCCCC(F)(F)F)NC(C1=C(C)C=CC(Br)=C1)C(S1)=CC=C1C1=CC=C(F)C=C1	7.08798	2	1	8	529.39	41.13
B-e-6		O=C(N(CC1)CCC1CCCC1=CC=CC=C1)NC(C1=C(C)C=CC(Br)=C1)C(S1)=CC=C1C1=CC=C(F)C=C1	9.40249	1	1	8	605.61	32.34
B-e-7		ClC1=CN=C(C2CN(C(NC(C3=C(C)C=CC(Br)=C3)C(S3)=CC=C3C3=CC=C(F)C=C3)=O)C2)N=C1	6.67377	1	3	5	571.89	58.12
B-e-8		O=C(OC(C)(C)C)N1CC[C@@]2([H])[C@@](CN(C(NC(C3=C(C)C=CC(Br)=C3)C(S3)=CC=C3C3=CC=C(F)C=C3)=O)C2)([H])C1	6.67358	1	2	6	628.6	61.88
B-e-9		O=C(OC(C)(C)C)NCC1CCCCN1C(NC(C1=C(C)C=CC(Br)=C1)C(S1)=CC=C1C1=CC=C(F)C=C1)=O	7.40284	2	2	8	616.59	70.67
B-e-10		O=C(N(CCCC1)C1C1=NC2=CC=CC=C2S1)NC(C1=C(C)C=CC(Br)=C1)C(S1)=CC=C1C1=CC=C(F)C=C1	8.79778	1	2	5	620.6	45.23
B-e-11		O=C(NCC1CN(C2CCN(C(NC(C3=C(C)C=CC(Br)=C3)C(S3)=CC=C3C3=CC=C(F)C=C3)=O)CC2)C1)OC(C)(C)C	6.40178	2	3	9	671.67	73.91
B-e-12		O=C(NCC1(C2=CC=CC=C2)CCOCC1)NC(C1=C(C)C=CC(Br)=C1)C(S1)=CC=C1C1=CC=C(F)C=C1	7.50751	2	2	7	593.56	50.36
B-f-1		O=C(N%40CCCC%40CN%41CCCCCC%41)NC(C%42=C(C)C=CC(Br)=C%42)C(S%43)=CC=C%43C%44=CC=C(F)C=C%44	7.57674	1	2	6	584.59	35.58
B-f-2		CN(C)CC(C=C%80)=CC=C%80C%81CCCN%81C(NC(C%82=C(C)C=CC(Br)=C%82)C(S%83)=CC=C%83C%84=CC=C(F)C=C%84)=O	7.92903	1	2	7	606.6	35.58
B-f-3		CC(C)(C)OC(NC1(CNC(NC(C2=C(C)C=CC(Br)=C2)C(S2)=CC=C2C2=CC=C(F)C=C2)=O)CCOCC1)=O	6.15399	3	3	9	632.59	88.69
B-f-4		CC(NC(OC(C)(C)C)=O)C1CCN(C(NC(C2=C(C)C=CC(Br)=C2)C(S2)=CC=C2C2=CC=C(F)C=C2)=O)C1	6.97504	2	2	8	616.59	70.67
B-f-5		ClC1=CC=CC=C1N1CC2(CCN(C(NC(C3=C(C)C=CC(Br)=C3)C(S3)=CC=C3C3=CC=C(F)C=C3)=O)C2)CC1	8.39597	1	2	5	639.02	35.58
B-f-6		CC(C)(C)OC(N1C[C@@]2([H])N(C(NC(C3=C(C)C=CC(Br)=C3)C(S3)=CC=C3C3=CC=C(F)C=C3)=O)C[C@]1([H])C2)=O	6.55283	1	2	6	600.55	61.88
B-f-7		CC1=NOC(C)=C1CCNC(NC(C1=C(C)C=CC(Br)=C1)C(S1)=CC=C1C1=CC=C(F)C=C1)=O	6.28253	2	2	7	542.47	67.16
B-f-8		CC1(C)[C@@]2([H])CC[C@@H](CNC(NC(C3=C(C)C=CC(Br)=C3)C(S3)=CC=C3C3=CC=C(F)C=C3)=O)[C@@]1(C2)[H]	7.94101	2	1	6	555.55	41.13
B-f-9		CC(NC(NC(C1=C(C)C=CC(Br)=C1)C(S1)=CC=C1C1=CC=C(F)C=C1)=O)C1=CC=C(F)C=N1	6.87366	2	2	6	542.44	54.02
B-f-10		O=C1C2(CCCN(C(NC(C3=C(C)C=CC(Br)=C3)C(S3)=CC=C3C3=CC=C(F)C=C3)=O)C2)CC2=CC=CC=C21	7.94199	1	2	4	603.55	49.41
B-f-11		CC(C)(C)OC(N(CC1)CCC1(CNC(NC(C1=C(C)C=CC(Br)=C1)C(S1)=CC=C1C1=CC=C(F)C=C1)=O)C1=CC=CC=C1)=O	8.47328	2	2	9	692.69	70.67
B-f-12		CC(CNC(NC(C1=C(C)C=CC(Br)=C1)C(S1)=CC=C1C1=CC=C(F)C=C1)=O)CC1=CC=CC=N1	7.05284	2	2	8	552.51	54.02
B-g-1		O=C%45OCC%46(CCN(C(NC(C%47=C(C)C=CC(Br)=C%47)C(S%48)=CC=C%48C%49=CC=C(F)C=C%49)=O)CC%46)CN%45	5.52332	2	2	4	572.49	70.67
B-g-2		CC(C)(C)OC(N(CCOC)CCNC(NC(C%85=C(C)C=CC(Br)=C%85)C(S%86)=CC=C%86C%87=CC=C(F)C=C%87)=O)=O	6.44573	2	3	12	620.58	79.9
B-g-3		O=C(N1CC2(CC2)C2(OCCO2)C1)NC(C1=C(C)C=CC(Br)=C1)C(S1)=CC=C1C1=CC=C(F)C=C1	6.48869	1	3	4	557.48	50.8
B-g-4		CC(C)(C)OC(NC1[C@]2([H])CN(C(NC(C3=C(C)C=CC(Br)=C3)C(S3)=CC=C3C3=CC=C(F)C=C3)=O)C[C@@]21[H])=O	6.10666	2	2	7	600.55	70.67
B-g-5		C[C@@H](NC(OC(C)(C)C)=O)CNC(NC(C1=C(C)C=CC(Br)=C1)C(S1)=CC=C1C1=CC=C(F)C=C1)=O	6.68561	3	2	9	576.53	79.46
B-g-6		C/C(CC/C=C(C)/C)=C\CNC(NC(C1=C(C)C=CC(Br)=C1)C(S1)=CC=C1C1=CC=C(F)C=C1)=O	8.59488	2	1	9	555.55	41.13
B-g-7		O=C(OC(C)(C)C)NCCOCCNC(NC(C1=C(C)C=CC(Br)=C1)C(S1)=CC=C1C1=CC=C(F)C=C1)=O	6.22206	3	3	12	606.55	88.69
B-g-8		O=C(OC(C)(C)C)N1CCC21CCN(C(NC(C1=C(C)C=CC(Br)=C1)C(S1)=CC=C1C1=CC=C(F)C=C1)=O)CC2	6.53675	1	2	6	628.6	61.88
B-g-9		CN1CC2CCCC(C1)N2C(NC(C1=C(C)C=CC(Br)=C1)C(S1)=CC=C1C1=CC=C(F)C=C1)=O	6.61462	1	2	4	542.51	35.58
B-g-10		O=C(OC(C)(C)C)N1C[C@@]2([H])[C@@](N2C(NC(C2=C(C)C=CC(Br)=C2)C(S2)=CC=C2C2=CC=C(F)C=C2)=O)([H])C1	6.49287	1	2	6	586.52	61.65
B-g-11		CC(C)(C)OC(N1CC[C@]2([H])[C@@]1([H])CN(C(NC(C1=C(C)C=CC(Br)=C1)C(S1)=CC=C1C1=CC=C(F)C=C1)=O)CC2)=O	7.07339	1	2	6	628.6	61.88
B-g-12		FC1=C(C2(CNC(NC(C3=C(C)C=CC(Br)=C3)C(S3)=CC=C3C3=CC=C(F)C=C3)=O)CCC2)C(F)=CC=C1	8.59627	2	1	7	599.51	41.13
B-h-1		O=C%50C%51=CC=CC=C%51OC%52(CCN(C(NC(C%53=C(C)C=CC(Br)=C%53)C(S%54)=CC=C%54C%55=CC=C(F)C=C%55)=O)CC%52)N%50	7.2737	2	3	4	620.54	70.67
B-h-2		COC[C@H]%88N(C(NC(C%89=C(C)C=CC(Br)=C%89)C(S%90)=CC=C%90C%91=CC=C(F)C=C%91)=O)[C@H](COC)CC%88	6.22898	1	3	8	561.51	50.8
B-h-3		[H][C@@]12[C@@](CCN(C(NC(C3=C(C)C=CC(Br)=C3)C(S3)=CC=C3C3=CC=C(F)C=C3)=O)C2)([H])CCCC1	7.72537	1	1	4	541.52	32.34
B-h-4		O=C(N1CC(CC2=CC(OCO3)=C3C=C2)CCC1)NC(C1=C(C)C=CC(Br)=C1)C(S1)=CC=C1C1=CC=C(F)C=C1	8.21454	1	3	6	621.57	50.8
B-h-5		CC(C)(C)OC(NC[C@H]1CCN(C(NC(C2=C(C)C=CC(Br)=C2)C(S2)=CC=C2C2=CC=C(F)C=C2)=O)C1)=O	6.55846	2	2	8	602.56	70.67
B-h-6		COC(C=CC=C1CNC(NC(C2=C(C)C=CC(Br)=C2)C(S2)=CC=C2C2=CC=C(F)C=C2)=O)=C1OC1CCCC1	8.33775	2	3	9	623.58	59.59
B-h-7		O=S(CCC1(CNC(NC(C2=C(C)C=CC(Br)=C2)C(S2)=CC=C2C2=CC=C(F)C=C2)=O)N2CCOCC2)(CC1)=O	4.13788	2	5	7	650.62	87.74
B-h-8		O=C(N(CC1)CCC21COC1=CC=CC=C12)NC(C1=C(C)C=CC(Br)=C1)C(S1)=CC=C1C1=CC=C(F)C=C1	7.44897	1	2	4	591.54	41.57
B-h-9		O=S(N(C1CC1)C1CCN(C(NC(C2=C(C)C=CC(Br)=C2)C(S2)=CC=C2C2=CC=C(F)C=C2)=O)CC1)(C1=CC=C(Cl)C=C1)=O	7.73047	1	3	7	717.11	69.72
B-h-10		BrC1=CC=C(C2(NC(NC(C3=C(C)C=CC(Br)=C3)C(S3)=CC=C3C3=CC=C(F)C=C3)=O)CCC2)C=C1	8.90105	2	1	6	628.4	41.13
B-h-11		O=C6C7=CC(C(NC[C@@H](C(O)=O)NS(C8=CC=C(C)C=C8)(=O)=O)=O)=NN7CCCN6CCC9CCN(C(NC(C%10=C(C)C=CC(Br)=C%10)C(S%11)=CC=C%11C%12=CC=C(F)C=C%12)=O)CC9	6.26394	4	8	13	948.92	183.04
B-h-12		CCC(N(C1=CC=CC=C1)C1CCN(C(NC(C2=C(C)C=CC(Br)=C2)C(S2)=CC=C2C2=CC=C(F)C=C2)=O)CC1)=O	7.40979	1	2	7	634.61	52.65
C-a-1		O=C%11[C@@]%12(CC(C=CC(NC(NC(CCCC)C(C=C%13)=CC=C%13OC(C%14=CC=C(OC)C=C%14)=O)=O)=C%15)=C%15C%12)C%16=CC=CN=C%16N%11	6.91565	3	5	10	590.68	118.65
C-a-2		O=S%46(C%47=CC(NC(NC(CCCC)C(C=C%48)=CC=C%48OC(C%49=CC=C(OC)C=C%49)=O)=O)=CC=C%47OCC%46)=O	4.82086	2	6	10	538.62	120.03
C-a-3		O=C(OC(C)(C)C)NC%74=C(NC(NC(CCCC)C(C=C%75)=CC=C%75OC(C%76=CC=C(OC)C=C%76)=O)=O)C=C(OC(F)(F)F)C=C%74	8.49963	3	6	15	631.649	124.22
C-a-4		BrC1=CN(C(NC(CCCC)C(C=C2)=CC=C2OC(C2=CC=C(OC)C=C2)=O)=O)C2=C1C=CN=C2	5.8895	1	4	9	536.426	82.45
C-a-5		O=C(C1=CC(NC(NC(CCCC)C(C=C2)=CC=C2OC(C2=CC=C(OC)C=C2)=O)=O)=CC=C1)NCC1=NC=CC=C1	5.82015	3	5	13	566.658	118.65
C-a-6		O=C(OC(C)(C)C)NC1=C(NC(NC(CCCC)C(C=C2)=CC=C2OC(C2=CC=C(OC)C=C2)=O)=O)C=C(N2C=CC=C2)C=C1	8.03004	3	5	14	612.727	119.92
C-a-7		ClC1=CC(NC(NC(CCCC)C(C=C2)=CC=C2OC(C2=CC=C(OC)C=C2)=O)=O)=C(NC(OC(C)(C)C)=O)C=C1N(C)C	7.78061	3	6	14	625.16	118.23
C-a-8		CC1=CC(C)=NN1C1=CC=CC=C1NC(NC(CCCC)C(C=C1)=CC=C1OC(C1=CC=C(OC)C=C1)=O)=O	6.57431	2	4	11	526.637	94.48
C-a-9		CCC1=NOC(C2=CC(NC(NC(CCCC)C(C=C3)=CC=C3OC(C3=CC=C(OC)C=C3)=O)=O)=CC=C2)=N1	7.28214	2	5	12	528.609	115.58
C-a-10		FC1=CC=C2C(C=C(NC(NC(CCCC)C(C=C3)=CC=C3OC(C3=CC=C(OC)C=C3)=O)=O)C=N2)=C1	6.45792	2	4	10	501.558	89.55
C-a-11		O=C(OCC1=CC=CC=C1)N(C1)CCC2=C1C=C(NC(NC(CCCC)C(C=C1)=CC=C1OC(C1=CC=C(OC)C=C1)=O)=O)C=N2	6.52165	2	5	13	622.722	119.09
C-a-12		O=C(OC1=CC=C(C(NC(NC2=CC=CC(N3N=CC=N3)=C2)=O)CCCC)C=C1)C1=CC=C(OC)C=C1	5.5313	2	5	11	499.571	107.37
C-b-1		O=C(NC%17=C(NC(OC(C)(C)C)=O)C=CC=C%17)C%18=CC=C(NC(NC(CCCC)C(C=C%19)=CC=C%19OC(C%20=CC=C(OC)C=C%20)=O)=O)C=C%18	8.1604	4	6	15	666.775	144.09
C-b-2		O=C(OC%50=CC=C(C(NC(NC%51=CC=CC%52=CN=CC=C%52%51)=O)CCCC)C=C%50)C%53=CC=C(OC)C=C%53	5.92936	2	4	10	483.568	89.55
C-b-3		CC(C)N%77N=CC%78=CC(NC(NC(CCCC)C(C=C%79)=CC=C%79OC(C%80=CC=C(OC)C=C%80)=O)=O)=CC=C%78%77	6.37768	2	4	11	514.626	94.48
C-b-4		ClC1=NC=C(C=CC=C2NC(NC(CCCC)C(C=C3)=CC=C3OC(C3=CC=C(OC)C=C3)=O)=O)C2=C1	6.75358	2	4	10	518.01	89.55
C-b-5		BrC1=CC(NC(NC(CCCC)C(C=C2)=CC=C2OC(C2=CC=C(OC)C=C2)=O)=O)=CC(C2CC2)=C1	7.70759	2	3	11	551.481	76.66
C-b-6		CC(C)(C)OC(N(C(OC(C)(C)C)=O)C1=NC=CC2=CC(NC(NC(CCCC)C(C=C3)=CC=C3OC(C4=CC=C(OC)C=C4)=O)=O)=CC=C21)=O	8.73703	2	7	15	698.817	145.39
C-b-7		CC(CC1(C)C)(C)C2=C1C([N+]([O-])=O)=C(C)C(NC(NC(CCCC)C(C=C1)=CC=C1OC(C1=CC=C(OC)C=C1)=O)=O)=C2	8.79278	2	5	11	587.717	119.8
C-b-8		O=S(CCN1C2=CC=C(NC(NC(CCCC)C(C=C3)=CC=C3OC(C3=CC=C(OC)C=C3)=O)=O)C=C2)(CC1)=O	4.92596	2	6	11	565.69	114.04
C-b-9		O=C(OCC)C1=CC2=CC(OC)=C(NC(NC(CCCC)C(C=C3)=CC=C3OC(C3=CC=C(OC)C=C3)=O)=O)C=C2N1	6.37894	3	5	14	573.646	127.98
C-b-10		ClC1=CC2=C(SC=C2NC(NC(CCCC)C(C=C2)=CC=C2OC(C2=CC=C(OC)C=C2)=O)=O)C=C1	7.63763	2	3	10	523.04	76.66
C-b-11		O=S1(N(CCCC1)C1=CC(F)=C(NC(NC(CCCC)C(C=C2)=CC=C2OC(C2=CC=C(OC)C=C2)=O)=O)C=C1)=O	5.45506	2	5	11	583.68	114.04
C-b-12		O=C(OC1=CC=C(C(NC(NC2=CN=CC3=CC=CC=C32)=O)CCCC)C=C1)C1=CC=C(OC)C=C1	5.92936	2	4	10	483.568	89.55
C-c-1		O=C(OC%21=CC=C(C(NC(NC%22=C(C=NC=C%23)C%23=CC=C%22)=O)CCCC)C=C%21)C%24=CC=C(OC)C=C%24	5.92936	2	4	10	483.568	89.55
C-c-2		ClC%54=NC(Cl)=CC(NC(NC(CCCC)C(C=C%55)=CC=C%55OC(C%56=CC=C(OC)C=C%56)=O)=O)=C%54N	5.7594	3	5	10	517.41	115.57
C-c-3		O=C(OC%81=CC=C(C(NC(NC(C=N%82)=CC=C%82OCCN%83CCCCC%83)=O)CCCC)C=C%81)C%84=CC=C(OC)C=C%84	6.24568	2	6	14	560.695	102.02
C-c-4		N#CC1(CCCCC1)C1=CC=C(NC(NC(CCCC)C(C=C2)=CC=C2OC(C2=CC=C(OC)C=C2)=O)=O)C=C1	7.82224	2	4	11	539.676	100.45
C-c-5		O=C1N(CCOC)N=NC2=C1C=C(NC(NC(CCCC)C(C=C1)=CC=C1OC(C1=CC=C(OC)C=C1)=O)=O)C=C2	6.15	2	7	13	559.623	130.92
C-c-6		BrC1=CC=CC(C2=NC=C(NC(NC(CCCC)C(C=C3)=CC=C3OC(C3=CC=C(OC)C=C3)=O)=O)C=N2)=C1	7.446	2	5	11	589.49	102.44
C-c-7		O=C(OC1=CC=C(C(NC(NC2=CC=CN=C2C2=CC=CC=C2)=O)CCCC)C=C1)C1=CC=C(OC)C=C1	6.97296	2	4	11	509.606	89.55
C-c-8		O=C1OCCN1C1=CC=CC=C1NC(NC(CCCC)C(C=C1)=CC=C1OC(C1=CC=C(OC)C=C1)=O)=O	5.7071	2	5	11	517.582	106.2
C-c-9		CCOC(C1=C(C)N=C2N1C=CC=C2NC(NC(CCCC)C(C=C1)=CC=C1OC(C1=CC=C(OC)C=C1)=O)=O)=O	5.35552	2	5	13	558.635	120.26
C-c-10		FC1=CC(NC(NC(CCCC)C(C=C2)=CC=C2OC(C2=CC=C(OC)C=C2)=O)=O)=CC(F)=C1C1CC1	7.22425	2	3	11	508.566	76.66
C-c-11		O=C(O)C1CCC2=C1C=CC=C2NC(NC(CCCC)C(C=C1)=CC=C1OC(C1=CC=C(OC)C=C1)=O)=O	6.38799	3	5	11	516.594	113.96
C-c-12		CC1=CC(NC(NC(CCCC)C(C=C2)=CC=C2OC(C2=CC=C(OC)C=C2)=O)=O)=CC(B2OC(C)(C)C(C)(C)O2)=C1	8.6959	2	5	11	572.51	95.12
C-d-1		CCOC(C(C)(C)OC%25=CC(NC(NC(CCCC)C(C=C%26)=CC=C%26OC(C%27=CC=C(OC)C=C%27)=O)=O)=CC=C%25)=O	6.9821	2	5	15	562.663	112.19
C-d-2		O=C(OC%57=CC=C(C(NC(NC%58=CN=C(C%59CCC%59)N=C%58)=O)CCCC)C=C%57)C%60=CC=C(OC)C=C%60	5.96635	2	5	11	488.588	102.44
C-d-3		CN(C)C(C%85=C(C)C(C(OC)=O)=C(NC(NC(CCCC)C(C=C%86)=CC=C%86OC(C%87=CC=C(OC)C=C%87)=O)=O)S%85)=O	6.70133	2	5	13	581.68	123.27
C-d-4		CC(COC)OC1=CC=C(NC(NC(CCCC)C(C=C2)=CC=C2OC(C2=CC=C(OC)C=C2)=O)=O)C=C1	6.36949	2	5	14	520.626	95.12
C-d-5		COC1=CC(NC(NC(CCCC)C(C=C2)=CC=C2OC(C2=CC=C(OC)C=C2)=O)=O)=CC=C1	5.99989	2	4	11	462.546	85.89
C-d-6		BrC1=C(NC(NC(CCCC)C(C=C2)=CC=C2OC(C2=CC=C(OC)C=C2)=O)=O)C(OC)=CC=C1C(F)(F)F	7.64649	2	4	12	609.44	85.89
C-d-7		O=C(OC1=CC=C(C(NC(NC2=CC(C(F)(F)F)=CC(C(F)(F)F)=C2)=O)CCCC)C=C1)C1=CC=C(OC)C=C1	7.91326	2	3	12	568.516	76.66
C-d-8		CC1=C(OC)C=CC(CCNC(NC(CCCC)C(C=C2)=CC=C2OC(C2=CC=C(OC)C=C2)=O)=O)=C1	6.50887	2	4	13	504.627	85.89
C-d-9		O=C(OC(C)(C)C)N1CCN(C2CN(C(NC(CCCC)C(C=C3)=CC=C3OC(C3=CC=C(OC)C=C3)=O)=O)C2)CC1	5.01782	1	5	12	580.726	100.65
C-d-10		O=C(OC1=CC=C(C(NC(N2CCCC32CCC2=C3C=C(N3CCOCC3)C=C2)=O)CCCC)C=C1)C1=CC=C(OC)C=C1	6.85147	1	5	10	597.756	80.34
C-d-11		CN1[C@@]2([H])C[C@@H](NC(NC(CCCC)C(C=C3)=CC=C3OC(C3=CC=C(OC)C=C3)=O)=O)C[C@]1([H])CCC2	5.1367	2	4	10	493.648	79.9
C-d-12		O=C(OC(C)(C)C)N(CC1)CCC1C1CCCN(C(NC(CCCC)C(C=C2)=CC=C2OC(C2=CC=C(OC)C=C2)=O)=O)C1	6.45384	1	4	12	607.792	97.41
C-e-1		O=C(OC%28=CC=C(C(NC(N(CC%29)CCC%30%29OC%31=CC=CC=C%31O%30)=O)CCCC)C=C%28)C%32=CC=C(OC)C=C%32	6.60779	1	5	9	530.621	86.33
C-e-2		[H][C@]12[C@](CN(C(NC(CCCC)C(C=C3)=CC=C3OC(C4=CC=C(OC)C=C4)=O)=O)[C@H](C(NC(C)(C)C)=O)C2)([H])CCCC1	6.45207	2	4	11	577.766	96.97
C-e-3		COC(C(OC)=C%88)=CC%89=C%88CCN(C%89)C%90CCN(C(NC(CCCC)C(C=C%91)=CC=C%91OC(C%92=CC=C(OC)C=C%92)=O)=O)CC%90	5.83949	1	6	12	615.771	89.57
C-e-4		CC(C)(C)OC(NCCCCCCCCCCNC(NC(CCCC)C(C=C1)=CC=C1OC(C1=CC=C(OC)C=C1)=O)=O)=O	8.07984	3	4	22	611.824	114.99
C-e-5		O=C(OC1=CC=C(C(NC(NCCCC(F)(F)F)=O)CCCC)C=C1)C1=CC=C(OC)C=C1	5.65405	2	3	13	466.501	76.66
C-e-6		O=C(OC1=CC=C(C(NC(N(CC2)CCC2CCCC2=CC=CC=C2)=O)CCCC)C=C1)C1=CC=C(OC)C=C1	7.96856	1	3	13	542.72	67.87
C-e-7		ClC1=CN=C(C2CN(C(NC(CCCC)C(C=C3)=CC=C3OC(C3=CC=C(OC)C=C3)=O)=O)C2)N=C1	5.25365	1	5	10	509	93.65
C-e-8		O=C(OC(C)(C)C)N1CC[C@@]2([H])[C@@](CN(C(NC(CCCC)C(C=C3)=CC=C3OC(C3=CC=C(OC)C=C3)=O)=O)C2)([H])C1	5.23965	1	4	11	565.711	97.41
C-e-9		O=C(OC(C)(C)C)NCC1CCCCN1C(NC(CCCC)C(C=C1)=CC=C1OC(C1=CC=C(OC)C=C1)=O)=O	5.96891	2	4	13	553.7	106.2
C-e-10		O=C(OC1=CC=C(C(NC(N(CCCC2)C2C2=NC3=CC=CC=C3S2)=O)CCCC)C=C1)C1=CC=C(OC)C=C1	7.36385	1	4	10	557.71	80.76
C-e-11		O=C(NCC1CN(C2CCN(C(NC(CCCC)C(C=C3)=CC=C3OC(C3=CC=C(OC)C=C3)=O)=O)CC2)C1)OC(C)(C)C	4.96785	2	5	14	608.78	109.44
C-e-12		O=C(OC1=CC=C(C(NC(NCC2(C3=CC=CC=C3)CCOCC2)=O)CCCC)C=C1)C1=CC=C(OC)C=C1	6.07358	2	4	12	530.665	85.89
C-f-1		O=C(OC%33=CC=C(C(NC(N%34CCCC%34CN%35CCCCCC%35)=O)CCCC)C=C%33)C%36=CC=C(OC)C=C%36	6.14281	1	4	11	521.702	71.11
C-f-2		CN(C)CC(C=C%65)=CC=C%65C%66CCCN%66C(NC(CCCC)C(C=C%67)=CC=C%67OC(C%68=CC=C(OC)C=C%68)=O)=O	6.4951	1	4	12	543.708	71.11
C-f-3		CC(C)(C)OC(NC%93(CNC(NC(CCCC)C(C=C%94)=CC=C%94OC(C%95=CC=C(OC)C=C%95)=O)=O)CCOCC%93)=O	4.72006	3	5	14	569.699	124.22
C-f-4		CC(NC(OC(C)(C)C)=O)C1CCN(C(NC(CCCC)C(C=C2)=CC=C2OC(C2=CC=C(OC)C=C2)=O)=O)C1	5.54111	2	4	13	553.7	106.2
C-f-5		ClC1=CC=CC=C1N1CC2(CCN(C(NC(CCCC)C(C=C3)=CC=C3OC(C3=CC=C(OC)C=C3)=O)=O)C2)CC1	6.96204	1	4	10	576.13	71.11
C-f-6		CC(C)(C)OC(N1C[C@@]2([H])N(C(NC(CCCC)C(C=C3)=CC=C3OC(C3=CC=C(OC)C=C3)=O)=O)C[C@]1([H])C2)=O	5.1189	1	4	11	537.657	97.41
C-f-7		CC1=NOC(C)=C1CCNC(NC(CCCC)C(C=C1)=CC=C1OC(C1=CC=C(OC)C=C1)=O)=O	4.8486	2	4	12	479.577	102.69
C-f-8		CC1(C)[C@@]2([H])CC[C@@H](CNC(NC(CCCC)C(C=C3)=CC=C3OC(C3=CC=C(OC)C=C3)=O)=O)[C@@]1(C2)[H]	6.50708	2	3	11	492.66	76.66
C-f-9		CC(NC(NC(CCCC)C(C=C1)=CC=C1OC(C1=CC=C(OC)C=C1)=O)=O)C1=CC=C(F)C=N1	5.43973	2	4	11	479.552	89.55
C-f-10		O=C1C2(CCCN(C(NC(CCCC)C(C=C3)=CC=C3OC(C3=CC=C(OC)C=C3)=O)=O)C2)CC2=CC=CC=C21	6.50806	1	4	9	540.66	84.94
C-f-11		CC(C)(C)OC(N(CC1)CCC1(CNC(NC(CCCC)C(C=C1)=CC=C1OC(C1=CC=C(OC)C=C1)=O)=O)C1=CC=CC=C1)=O	7.03935	2	4	14	629.798	106.2
C-f-12		CC(CNC(NC(CCCC)C(C=C1)=CC=C1OC(C1=CC=C(OC)C=C1)=O)=O)CC1=CC=CC=N1	5.61891	2	4	13	489.616	89.55
C-g-1		O=C%37OCC%38(CCN(C(NC(CCCC)C(C=C%39)=CC=C%39OC(C%40=CC=C(OC)C=C%40)=O)=O)CC%38)CN%37	4.08939	2	4	9	509.603	106.2
C-g-2		CC(C)(C)OC(N(CCOC)CCNC(NC(CCCC)C(C=C%69)=CC=C%69OC(C%70=CC=C(OC)C=C%70)=O)=O)=O	5.0118	2	5	17	557.688	115.43
C-g-3		O=C(OC%96=CC=C(C(NC(N%97CC%98(CC%98)C%99(OCCO%99)C%97)=O)CCCC)C=C%96)C1=CC=C(OC)C=C1	5.05476	1	5	9	494.588	86.33
C-g-4		CC(C)(C)OC(NC1[C@]2([H])CN(C(NC(CCCC)C(C=C3)=CC=C3OC(C3=CC=C(OC)C=C3)=O)=O)C[C@@]21[H])=O	4.67273	2	4	12	537.657	106.2
C-g-5		C[C@@H](NC(OC(C)(C)C)=O)CNC(NC(CCCC)C(C=C1)=CC=C1OC(C1=CC=C(OC)C=C1)=O)=O	5.25168	3	4	14	513.635	114.99
C-g-6		C/C(CC/C=C(C)/C)=C\CNC(NC(CCCC)C(C=C1)=CC=C1OC(C1=CC=C(OC)C=C1)=O)=O	7.16095	2	3	14	492.66	76.66
C-g-7		O=C(OC(C)(C)C)NCCOCCNC(NC(CCCC)C(C=C1)=CC=C1OC(C1=CC=C(OC)C=C1)=O)=O	4.78813	3	5	17	543.661	124.22
C-g-8		O=C(OC(C)(C)C)N1CCC21CCN(C(NC(CCCC)C(C=C1)=CC=C1OC(C1=CC=C(OC)C=C1)=O)=O)CC2	5.10282	1	4	11	565.711	97.41
C-g-9		CN1CC2CCCC(C1)N2C(NC(CCCC)C(C=C1)=CC=C1OC(C1=CC=C(OC)C=C1)=O)=O	5.18069	1	4	9	479.621	71.11
C-g-10		O=C(OC(C)(C)C)N1C[C@@]2([H])[C@@](N2C(NC(CCCC)C(C=C2)=CC=C2OC(C2=CC=C(OC)C=C2)=O)=O)([H])C1	5.05894	1	4	11	523.63	97.18
C-g-11		CC(C)(C)OC(N1CC[C@]2([H])[C@@]1([H])CN(C(NC(CCCC)C(C=C1)=CC=C1OC(C1=CC=C(OC)C=C1)=O)=O)CC2)=O	5.63946	1	4	11	565.711	97.41
C-g-12		FC1=C(C2(CNC(NC(CCCC)C(C=C3)=CC=C3OC(C3=CC=C(OC)C=C3)=O)=O)CCC2)C(F)=CC=C1	7.16234	2	3	12	536.62	76.66
C-h-1		O=C%41C%42=CC=CC=C%42OC%43(CCN(C(NC(CCCC)C(C=C%44)=CC=C%44OC(C%45=CC=C(OC)C=C%45)=O)=O)CC%43)N%41	5.83977	2	5	9	557.647	106.2
C-h-2		COC[C@H]%71N(C(NC(CCCC)C(C=C%72)=CC=C%72OC(C%73=CC=C(OC)C=C%73)=O)=O)[C@H](COC)CC%71	4.79505	1	5	13	498.62	86.33
C-h-3		[H][C@@]12[C@@](CCN(C(NC(CCCC)C(C=C3)=CC=C3OC(C3=CC=C(OC)C=C3)=O)=O)C2)([H])CCCC1	6.29144	1	3	9	478.633	67.87
C-h-4		O=C(OC1=CC=C(C(NC(N2CC(CC3=CC(OCO4)=C4C=C3)CCC2)=O)CCCC)C=C1)C1=CC=C(OC)C=C1	6.78061	1	5	11	558.675	86.33
C-h-5		CC(C)(C)OC(NC[C@H]1CCN(C(NC(CCCC)C(C=C2)=CC=C2OC(C2=CC=C(OC)C=C2)=O)=O)C1)=O	5.12453	2	4	13	539.673	106.2
C-h-6		COC(C=CC=C1CNC(NC(CCCC)C(C=C2)=CC=C2OC(C2=CC=C(OC)C=C2)=O)=O)=C1OC1CCCC1	6.90382	2	5	14	560.691	95.12
C-h-7		O=S(CCC1(CNC(NC(CCCC)C(C=C2)=CC=C2OC(C2=CC=C(OC)C=C2)=O)=O)N2CCOCC2)(CC1)=O	2.70395	2	7	12	587.73	123.27
C-h-8		O=C(OC1=CC=C(C(NC(N(CC2)CCC32COC2=CC=CC=C23)=O)CCCC)C=C1)C1=CC=C(OC)C=C1	6.01504	1	4	9	528.649	77.1
C-h-9		O=S(N(C1CC1)C1CCN(C(NC(CCCC)C(C=C2)=CC=C2OC(C2=CC=C(OC)C=C2)=O)=O)CC1)(C1=CC=C(Cl)C=C1)=O	6.29654	1	5	12	654.22	105.25
C-h-10		BrC1=CC=C(C2(NC(NC(CCCC)C(C=C3)=CC=C3OC(C3=CC=C(OC)C=C3)=O)=O)CCC2)C=C1	7.46712	2	3	11	565.508	76.66
C-h-11		O=C5C6=CC(C(NC[C@@H](C(O)=O)NS(C7=CC=C(C)C=C7)(=O)=O)=O)=NN6CCCN5CCC8CCN(C(NC(CCCC)C(C=C9)=CC=C9OC(C%10=CC=C(OC)C=C%10)=O)=O)CC8	4.83001	4	10	18	886.03	218.57
C-h-12		CCC(N(C1=CC=CC=C1)C1CCN(C(NC(CCCC)C(C=C2)=CC=C2OC(C2=CC=C(OC)C=C2)=O)=O)CC1)=O	5.97586	1	4	12	571.718	88.18

## Sheet: Deprotected Urea Set
Compound ID (Substrate-Row-Column)	Chemical Structure	SMILES Code	cLogP	Number of H-Bond Donors	Number of H-Bond Acceptors	Number of Rotatable Bonds	Molecular Weight (Da)	Topological Polar Surface Area (Å2)
De-A-a-1		O=C%19[C@@]%20(CC(C=CC(NC(NC%21CC(C)(C)C%22=CC(C(C)(C)C)=CC(C(C)=O)=C%22%21)=O)=C%23)=C%23C%20)C%24=CC=CN=C%24N%19	5.81764	3	4	4	536.676	100.19
De-A-a-2		O=S%25(C%26=CC(NC(NC%27CC(C)(C)C%28=CC(C(C)(C)C)=CC(C(C)=O)=C%28%27)=O)=CC=C%26OCC%25)=O	3.72286	2	5	4	484.61	101.57
De-A-a-3		NC%29=C(NC(NC%30CC(C)(C)C%31=CC(C(C)(C)C)=CC(C(C)=O)=C%31%30)=O)C=C(OC(F)(F)F)C=C%29	5.66174	3	4	6	477.528	93.45
De-A-a-4		BrC%32=CN(C(NC%33CC(C)(C)C%34=CC(C(C)(C)C)=CC(C(C)=O)=C%34%33)=O)C%35=C%32C=CN=C%35	4.7915	1	3	3	482.422	63.99
De-A-a-5		O=C(C%36=CC(NC(NC%37CC(C)(C)C%38=CC(C(C)(C)C)=CC(C(C)=O)=C%38%37)=O)=CC=C%36)NCC%39=NC=CC=C%39	4.72214	3	4	7	512.654	100.19
De-A-a-6		NC%40=C(NC(NC%41CC(C)(C)C%42=CC(C(C)(C)C)=CC(C(C)=O)=C%42%41)=O)C=C(N%43C=CC=C%43)C=C%40	5.19215	3	3	5	458.606	89.15
De-A-a-7		ClC%44=CC(NC(NC%45CC(C)(C)C%46=CC(C(C)(C)C)=CC(C(C)=O)=C%46%45)=O)=C(N)C=C%44N(C)C	4.94272	3	4	5	471.04	87.46
De-A-a-8		CC%47=CC(C)=NN%47C%48=CC=CC=C%48NC(NC%49CC(C)(C)C%50=CC(C(C)(C)C)=CC(C(C)=O)=C%50%49)=O	5.4763	2	3	5	472.633	76.02
De-A-a-9		CCC%51=NOC(C%52=CC(NC(NC%53CC(C)(C)C%54=CC(C(C)(C)C)=CC(C(C)=O)=C%54%53)=O)=CC=C%52)=N%51	6.26952	2	4	6	474.605	97.12
De-A-a-10		FC%55=CC=C%56C(C=C(NC(NC%57CC(C)(C)C%58=CC(C(C)(C)C)=CC(C(C)=O)=C%58%57)=O)C=N%56)=C%55	5.35991	2	3	4	447.554	71.09
De-A-a-11		CC%59(C)C%60=CC(C(C)(C)C)=CC(C(C)=O)=C%60C(NC(NC%61=CC%62=C(CCNC%62)N=C%61)=O)C%59	3.46994	3	4	4	434.584	83.12
De-A-a-12		CC%63(C)C%64=CC(C(C)(C)C)=CC(C(C)=O)=C%64C(NC(NC%65=CC=CC(N%66N=CC=N%66)=C%65)=O)C%63	4.4284	2	4	5	445.567	88.91
De-A-b-1		O=C(NC1=C(N)C=CC=C1)C2=CC=C(NC(NC3CC(C)(C)C4=CC(C(C)(C)C)=CC(C(C)=O)=C43)=O)C=C2	5.32251	4	4	6	512.654	113.32
De-A-b-2		CC%67(C)C%68=CC(C(C)(C)C)=CC(C(C)=O)=C%68C(NC(NC%69=CC=CC%70=CN=CC=C%70%69)=O)C%67	4.83136	2	3	4	429.564	71.09
De-A-b-3		CC(C)N%71N=CC%72=CC(NC(NC%73CC(C)(C)C%74=CC(C(C)(C)C)=CC(C(C)=O)=C%74%73)=O)=CC=C%72%71	5.27967	2	3	5	460.622	76.02
De-A-b-4		ClC%75=NC=C(C=CC=C%76NC(NC%77CC(C)(C)C%78=CC(C(C)(C)C)=CC(C(C)=O)=C%78%77)=O)C%76=C%75	5.65558	2	3	4	464.01	71.09
De-A-b-5		BrC%79=CC(NC(NC%80CC(C)(C)C%81=CC(C(C)(C)C)=CC(C(C)=O)=C%81%80)=O)=CC(C%82CC%82)=C%79	6.60959	2	2	5	497.477	58.2
De-A-b-6		NC5=NC=CC6=CC(NC(NC7CC(C)(C)C8=CC(C(C)(C)C)=CC(C(C)=O)=C87)=O)=CC=C65	4.59689	3	4	4	444.579	97.11
De-A-b-7		CC(CC%83(C)C)(C)C%84=C%83C([N+]([O-])=O)=C(C)C(NC(NC%85CC(C)(C)C%86=CC(C(C)(C)C)=CC(C(C)=O)=C%86%85)=O)=C%84	7.69478	2	4	5	533.713	101.34
De-A-b-8		O=S(CCN%87C%88=CC=C(NC(NC%89CC(C)(C)C%90=CC(C(C)(C)C)=CC(C(C)=O)=C%90%89)=O)C=C%88)(CC%87)=O	3.82795	2	5	5	511.68	95.58
De-A-b-9		O=C(OCC)C%91=CC%92=CC(OC)=C(NC(NC%93CC(C)(C)C%94=CC(C(C)(C)C)=CC(C(C)=O)=C%94%93)=O)C=C%92N%91	5.28093	3	4	8	519.642	109.52
De-A-b-10		ClC%95=CC%96=C(SC=C%96NC(NC%97CC(C)(C)C%98=CC(C(C)(C)C)=CC(C(C)=O)=C%98%97)=O)C=C%95	6.53962	2	2	4	469.04	58.2
De-A-b-11		O=S%99(N(CCCC%99)C1=CC(F)=C(NC(NC2CC(C)(C)C3=CC(C(C)(C)C)=CC(C(C)=O)=C32)=O)C=C1)=O	4.35706	2	4	5	529.67	95.58
De-A-b-12		CC1(C)C2=CC(C(C)(C)C)=CC(C(C)=O)=C2C(NC(NC2=CN=CC3=CC=CC=C32)=O)C1	4.83136	2	3	4	429.564	71.09
De-A-c-1		CC1(C)C2=CC(C(C)(C)C)=CC(C(C)=O)=C2C(NC(NC2=C(C=NC=C3)C3=CC=C2)=O)C1	4.83136	2	3	4	429.564	71.09
De-A-c-2		NC1=C(C=C(N=C1Cl)Cl)NC(NC1CC(C)(C)C2=CC(C(C)(C)C)=CC(C(C)=O)=C21)=O	4.6614	3	4	4	463.4	97.11
De-A-c-3		CC1(C)C2=CC(C(C)(C)C)=CC(C(C)=O)=C2C(NC(NC(C=N2)=CC=C2OCCN2CCCCC2)=O)C1	5.14768	2	5	8	506.691	83.56
De-A-c-4		N#CC1(CCCCC1)C1=CC=C(NC(NC2CC(C)(C)C3=CC(C(C)(C)C)=CC(C(C)=O)=C32)=O)C=C1	6.72423	2	3	5	485.672	81.99
De-A-c-5		O=C1N(CCOC)N=NC2=C1C=C(NC(NC1CC(C)(C)C3=CC(C(C)(C)C)=CC(C(C)=O)=C31)=O)C=C2	5.05199	2	6	7	505.619	112.46
De-A-c-6		BrC1=CC=CC(C2=NC=C(NC(NC3CC(C)(C)C4=CC(C(C)(C)C)=CC(C(C)=O)=C43)=O)C=N2)=C1	6.43338	2	4	5	535.486	83.98
De-A-c-7		CC1(C)C2=CC(C(C)(C)C)=CC(C(C)=O)=C2C(NC(NC2=CC=CN=C2C2=CC=CC=C2)=O)C1	5.87496	2	3	5	455.602	71.09
De-A-c-8		O=C1OCCN1C1=CC=CC=C1NC(NC1CC(C)(C)C2=CC(C(C)(C)C)=CC(C(C)=O)=C21)=O	4.6091	2	4	5	463.578	87.74
De-A-c-9		CCOC(C1=C(C)N=C2N1C=CC=C2NC(NC1CC(C)(C)C2=CC(C(C)(C)C)=CC(C(C)=O)=C21)=O)=O	4.25751	2	4	7	504.631	101.8
De-A-c-10		FC1=CC(NC(NC2CC(C)(C)C3=CC(C(C)(C)C)=CC(C(C)=O)=C32)=O)=CC(F)=C1C1CC1	6.12624	2	2	5	454.562	58.2
De-A-c-11		O=C(O)C1CCC2=C1C=CC=C2NC(NC1CC(C)(C)C2=CC(C(C)(C)C)=CC(C(C)=O)=C21)=O	5.28998	3	4	5	462.59	95.5
De-A-c-12		CC1=CC(NC(NC2CC(C)(C)C3=CC(C(C)(C)C)=CC(C(C)=O)=C32)=O)=CC(B2OC(C)(C)C(C)(C)O2)=C1	7.593	2	4	5	518.51	76.66
De-A-d-1		CCOC(C(C)(C)OC1=CC(NC(NC2CC(C)(C)C3=CC(C(C)(C)C)=CC(C(C)=O)=C32)=O)=CC=C1)=O	5.8841	2	4	9	508.659	93.73
De-A-d-2		CC1(C)C2=CC(C(C)(C)C)=CC(C(C)=O)=C2C(NC(NC2=CN=C(C3CCC3)N=C2)=O)C1	4.95373	2	4	5	434.584	83.98
De-A-d-3		CN(C)C(C1=C(C)C(C(OC)=O)=C(NC(NC2CC(C)(C)C3=CC(C(C)(C)C)=CC(C(C)=O)=C32)=O)S1)=O	5.60332	2	4	7	527.68	104.81
De-A-d-4		CC(COC)OC1=CC=C(NC(NC2CC(C)(C)C3=CC(C(C)(C)C)=CC(C(C)=O)=C32)=O)C=C1	5.27148	2	4	8	466.622	76.66
De-A-d-5		COC1=CC(NC(NC2CC(C)(C)C3=CC(C(C)(C)C)=CC(C(C)=O)=C32)=O)=CC=C1	4.90188	2	3	5	408.542	67.43
De-A-d-6		BrC1=C(NC(NC2CC(C)(C)C3=CC(C(C)(C)C)=CC(C(C)=O)=C32)=O)C(OC)=CC=C1C(F)(F)F	6.54848	2	3	6	555.436	67.43
De-A-d-7		CC1(C)C2=CC(C(C)(C)C)=CC(C(C)=O)=C2C(NC(NC2=CC(C(F)(F)F)=CC(C(F)(F)F)=C2)=O)C1	6.81525	2	2	6	514.512	58.2
De-A-d-8		CC1=C(OC)C=CC(CCNC(NC2CC(C)(C)C3=CC(C(C)(C)C)=CC(C(C)=O)=C32)=O)=C1	5.41087	2	3	7	450.623	67.43
De-A-d-9		CC1(C)C2=CC(C(C)(C)C)=CC(C(C)=O)=C2C(NC(N(C2)CC2N2CCNCC2)=O)C1	2.63662	2	4	4	426.605	64.68
De-A-d-10		CC1(C)C2=CC(C(C)(C)C)=CC(C(C)=O)=C2C(NC(N2CCCC32CCC2=C3C=C(N3CCOCC3)C=C2)=O)C1	5.75347	1	4	4	543.752	61.88
De-A-d-11		CN1[C@@]2([H])C[C@@H](NC(NC3CC(C)(C)C4=CC(C(C)(C)C)=CC(C(C)=O)=C43)=O)C[C@]1([H])CCC2	4.03869	2	3	4	439.644	61.44
De-A-d-12		CC1(C)C2=CC(C(C)(C)C)=CC(C(C)=O)=C2C(NC(N2CCCC(C3CCNCC3)C2)=O)C1	4.07264	2	3	4	453.671	61.44
De-A-e-1		CC1(C)C2=CC(C(C)(C)C)=CC(C(C)=O)=C2C(NC(N(CC2)CCC32OC2=CC=CC=C2O3)=O)C1	5.50978	1	4	3	476.617	67.87
De-A-e-2		[H][C@]12[C@](CN(C(NC3CC(C)(C)C4=CC(C(C)(C)C)=CC(C(C)=O)=C43)=O)[C@H](C(NC(C)(C)C)=O)C2)([H])CCCC1	5.35406	2	3	5	523.762	78.51
De-A-e-3		COC(C(OC)=C1)=CC2=C1CCN(C2)C1CCN(C(NC2CC(C)(C)C3=CC(C(C)(C)C)=CC(C(C)=O)=C32)=O)CC1	4.74149	1	5	6	561.767	71.11
De-A-e-4		NCCCCCCCCCCNC(NC1CC(C)(C)C2=CC(C(C)(C)C)=CC(C(C)=O)=C21)=O	5.48974	3	3	13	457.703	84.22
De-A-e-5		CC1(C)C2=CC(C(C)(C)C)=CC(C(C)=O)=C2C(NC(NCCCC(F)(F)F)=O)C1	4.55605	2	2	7	412.497	58.2
De-A-e-6		CC1(C)C2=CC(C(C)(C)C)=CC(C(C)=O)=C2C(NC(N(CC2)CCC2CCCC2=CC=CC=C2)=O)C1	6.87056	1	2	7	488.716	49.41
De-A-e-7		ClC1=CN=C(C2CN(C(NC3CC(C)(C)C4=CC(C(C)(C)C)=CC(C(C)=O)=C43)=O)C2)N=C1	4.24103	1	4	4	455	75.19
De-A-e-8		[H][C@@]12[C@@](CN(C(NC3CC(C)(C)C4=CC(C(C)(C)C)=CC(C(C)=O)=C43)=O)C2)([H])CNCC1	2.85845	2	3	3	411.59	61.44
De-A-e-9		NCC1CCCCN1C(NC1CC(C)(C)C2=CC(C(C)(C)C)=CC(C(C)=O)=C21)=O	3.37881	2	3	4	399.579	75.43
De-A-e-10		CC1(C)C2=CC(C(C)(C)C)=CC(C(C)=O)=C2C(NC(N(CCCC2)C2C2=NC3=CC=CC=C3S2)=O)C1	6.26585	1	3	4	503.71	62.3
De-A-e-11		NCC1CN(C2CCN(C(NC3CC(C)(C)C4=CC(C(C)(C)C)=CC(C(C)=O)=C43)=O)CC2)C1	2.37774	2	4	5	454.659	78.67
De-A-e-12		CC1(C)C2=CC(C(C)(C)C)=CC(C(C)=O)=C2C(NC(NCC2(C3=CC=CC=C3)CCOCC2)=O)C1	4.97558	2	3	6	476.661	67.43
De-A-f-1		CC1(C)C2=CC(C(C)(C)C)=CC(C(C)=O)=C2C(NC(N2CCCC2CN2CCCCCC2)=O)C1	5.04481	1	3	5	467.698	52.65
De-A-f-2		CN(C)CC(C=C1)=CC=C1C1CCCN1C(NC1CC(C)(C)C2=CC(C(C)(C)C)=CC(C(C)=O)=C21)=O	5.3971	1	3	6	489.704	52.65
De-A-f-3		NC1(CNC(NC2CC(C)(C)C3=CC(C(C)(C)C)=CC(C(C)=O)=C32)=O)CCOCC1	2.12996	3	4	5	415.578	93.45
De-A-f-4		CC(N)C1CCN(C(NC2CC(C)(C)C3=CC(C(C)(C)C)=CC(C(C)=O)=C32)=O)C1	2.951	2	3	4	399.579	75.43
De-A-f-5		ClC1=CC=CC=C1N1CC2(CCN(C(NC3CC(C)(C)C4=CC(C(C)(C)C)=CC(C(C)=O)=C43)=O)C2)CC1	5.86404	1	3	4	522.13	52.65
De-A-f-6		[H][C@@]12NC[C@@](C2)([H])N(C(NC2CC(C)(C)C3=CC(C(C)(C)C)=CC(C(C)=O)=C32)=O)C1	2.7377	2	3	3	383.536	61.44
De-A-f-7		CC1=NOC(C)=C1CCNC(NC1CC(C)(C)C2=CC(C(C)(C)C)=CC(C(C)=O)=C21)=O	3.7506	2	3	6	425.573	84.23
De-A-f-8		CC1(C)[C@@]2([H])CC[C@@H](CNC(NC3CC(C)(C)C4=CC(C(C)(C)C)=CC(C(C)=O)=C43)=O)[C@@]1(C2)[H]	5.40908	2	2	5	438.656	58.2
De-A-f-9		CC(NC(NC1CC(C)(C)C2=CC(C(C)(C)C)=CC(C(C)=O)=C21)=O)C1=CC=C(F)C=N1	4.34172	2	3	5	425.548	71.09
De-A-f-10		O=C1C2(CCCN(C(NC3CC(C)(C)C4=CC(C(C)(C)C)=CC(C(C)=O)=C43)=O)C2)CC2=CC=CC=C21	5.41006	1	3	3	486.656	66.48
De-A-f-11		CC9(C)C%10=CC(C(C)(C)C)=CC(C(C)=O)=C%10C(NC(NCC%11(CCNCC%11)C%12=CC=CC=C%12)=O)C9	4.65815	3	3	6	475.677	70.23
De-A-f-12		CC(CNC(NC1CC(C)(C)C2=CC(C(C)(C)C)=CC(C(C)=O)=C21)=O)CC1=CC=CC=N1	4.5209	2	3	7	435.612	71.09
De-A-g-1		O=C1OCC2(CCN(C(NC3CC(C)(C)C4=CC(C(C)(C)C)=CC(C(C)=O)=C43)=O)CC2)CN1	2.99138	2	3	3	455.599	87.74
De-A-g-2		COCCNCCNC(NC1CC(C)(C)C2=CC(C(C)(C)C)=CC(C(C)=O)=C21)=O	2.63061	3	4	9	403.567	79.46
De-A-g-3		CC1(C)C2=CC(C(C)(C)C)=CC(C(C)=O)=C2C(NC(N2CC3(CC3)C3(OCCO3)C2)=O)C1	3.95675	1	4	3	440.584	67.87
De-A-g-4		NC1[C@]2([H])CN(C(NC3CC(C)(C)C4=CC(C(C)(C)C)=CC(C(C)=O)=C43)=O)C[C@@]21[H]	2.08262	2	3	3	383.536	75.43
De-A-g-5		C[C@@H](N)CNC(NC1CC(C)(C)C2=CC(C(C)(C)C)=CC(C(C)=O)=C21)=O	2.66158	3	3	5	359.514	84.22
De-A-g-6		C/C(CC/C=C(C)/C)=C\CNC(NC1CC(C)(C)C2=CC(C(C)(C)C)=CC(C(C)=O)=C21)=O	6.06295	2	2	8	438.656	58.2
De-A-g-7		NCCOCCNC(NC1CC(C)(C)C2=CC(C(C)(C)C)=CC(C(C)=O)=C21)=O	2.19803	3	4	8	389.54	93.45
De-A-g-8		CC1(C)C2=CC(C(C)(C)C)=CC(C(C)=O)=C2C(NC(N2CCC3(CCN3)CC2)=O)C1	2.72162	2	3	3	411.59	61.44
De-A-g-9		CN1CC2CCCC(C1)N2C(NC1CC(C)(C)C2=CC(C(C)(C)C)=CC(C(C)=O)=C21)=O	4.08268	1	3	3	425.617	52.65
De-A-g-10		[H][C@]1(N2C(NC3CC(C)(C)C4=CC(C(C)(C)C)=CC(C(C)=O)=C43)=O)[C@]2([H])CNC1	2.67774	2	3	3	369.509	61.21
De-A-g-11		[H][C@]12NCC[C@@]1([H])CCN(C(NC1CC(C)(C)C3=CC(C(C)(C)C)=CC(C(C)=O)=C31)=O)C2	3.25826	2	3	3	411.59	61.44
De-A-g-12		FC1=C(C2(CNC(NC3CC(C)(C)C4=CC(C(C)(C)C)=CC(C(C)=O)=C43)=O)CCC2)C(F)=CC=C1	6.06434	2	2	6	482.616	58.2
De-A-h-1		O=C1C2=CC=CC=C2OC2(CCN(C(NC3CC(C)(C)C4=CC(C(C)(C)C)=CC(C(C)=O)=C43)=O)CC2)N1	4.74177	2	4	3	503.643	87.74
De-A-h-2		COC[C@H]1N(C(NC2CC(C)(C)C3=CC(C(C)(C)C)=CC(C(C)=O)=C32)=O)[C@H](COC)CC1	3.69704	1	4	7	444.616	67.87
De-A-h-3		[H][C@@]12[C@@](CCN(C(NC3CC(C)(C)C4=CC(C(C)(C)C)=CC(C(C)=O)=C43)=O)C2)([H])CCCC1	5.19343	1	2	3	424.629	49.41
De-A-h-4		CC1(C)C2=CC(C(C)(C)C)=CC(C(C)=O)=C2C(NC(N2CC(CC3=CC(OCO4)=C4C=C3)CCC2)=O)C1	5.68261	1	4	5	504.671	67.87
De-A-h-5		NC[C@H]1CCN(C(NC2CC(C)(C)C3=CC(C(C)(C)C)=CC(C(C)=O)=C32)=O)C1	2.53443	2	3	4	385.552	75.43
De-A-h-6		COC(C=CC=C1CNC(NC2CC(C)(C)C3=CC(C(C)(C)C)=CC(C(C)=O)=C32)=O)=C1OC1CCCC1	5.80582	2	4	8	506.687	76.66
De-A-h-7		O=S(CCC1(CNC(NC2CC(C)(C)C3=CC(C(C)(C)C)=CC(C(C)=O)=C32)=O)N2CCOCC2)(CC1)=O	1.60594	2	6	6	533.73	104.81
De-A-h-8		CC1(C)C2=CC(C(C)(C)C)=CC(C(C)=O)=C2C(NC(N(CC2)CCC32COC2=CC=CC=C23)=O)C1	4.91703	1	3	3	474.645	58.64
De-A-h-9		O=S(N(C1CC1)C1CCN(C(NC2CC(C)(C)C3=CC(C(C)(C)C)=CC(C(C)=O)=C32)=O)CC1)(C1=CC=C(Cl)C=C1)=O	5.19854	1	4	6	600.22	86.79
De-A-h-10		BrC1=CC=C(C2(NC(NC3CC(C)(C)C4=CC(C(C)(C)C)=CC(C(C)=O)=C43)=O)CCC2)C=C1	6.36911	2	2	5	511.504	58.2
De-A-h-11		O=C%13C%14=CC(C(NC[C@@H](C(O)=O)NS(C%15=CC=C(C)C=C%15)(=O)=O)=O)=NN%14CCCN%13CCC%16CCN(C(NC%17CC(C)(C)C%18=CC(C(C)(C)C)=CC(C(C)=O)=C%18%17)=O)CC%16	3.732	4	9	12	832.03	200.11
De-A-h-12		CCC(N(C1=CC=CC=C1)C1CCN(C(NC2CC(C)(C)C3=CC(C(C)(C)C)=CC(C(C)=O)=C32)=O)CC1)=O	4.87786	1	3	6	517.714	69.72
De-B-a-1		O=C%13[C@@]%14(CC(C=CC(NC(NC(C%15=C(C)C=CC(Br)=C%15)C(S%16)=CC=C%16C%17=CC=C(F)C=C%17)=O)=C%18)=C%18C%14)C%19=CC=CN=C%19N%13	8.34958	3	3	5	653.57	83.12
De-B-a-2		O=S%56(C%57=CC(NC(NC(C%58=C(C)C=CC(Br)=C%58)C(S%59)=CC=C%59C%60=CC=C(F)C=C%60)=O)=CC=C%57OCC%56)=O	6.25479	2	4	5	601.51	84.5
De-B-a-3		NC%92=C(NC(NC(C%93=C(C)C=CC(Br)=C%93)C(S%94)=CC=C%94C%95=CC=C(F)C=C%95)=O)C=C(OC(F)(F)F)C=C%92	8.19367	3	3	7	594.42	76.38
De-B-a-4		BrC1=CN(C(NC(C2=C(C)C=CC(Br)=C2)C(S2)=CC=C2C2=CC=C(F)C=C2)=O)C2=C1C=CN=C2	7.32343	1	2	4	599.32	46.92
De-B-a-5		O=C(C1=CC(NC(NC(C2=C(C)C=CC(Br)=C2)C(S2)=CC=C2C2=CC=C(F)C=C2)=O)=CC=C1)NCC1=NC=CC=C1	7.25408	3	3	8	629.55	83.12
De-B-a-6		NC1=C(NC(NC(C2=C(C)C=CC(Br)=C2)C(S2)=CC=C2C2=CC=C(F)C=C2)=O)C=C(N2C=CC=C2)C=C1	7.72408	3	2	6	575.5	72.08
De-B-a-7		ClC1=CC(NC(NC(C2=C(C)C=CC(Br)=C2)C(S2)=CC=C2C2=CC=C(F)C=C2)=O)=C(N)C=C1N(C)C	7.47465	3	3	6	587.94	70.39
De-B-a-8		CC1=CC(C)=NN1C1=CC=CC=C1NC(NC(C1=C(C)C=CC(Br)=C1)C(S1)=CC=C1C1=CC=C(F)C=C1)=O	8.00824	2	2	6	589.53	58.95
De-B-a-9		CCC1=NOC(C2=CC(NC(NC(C3=C(C)C=CC(Br)=C3)C(S3)=CC=C3C3=CC=C(F)C=C3)=O)=CC=C2)=N1	8.70225	2	3	7	591.5	80.05
De-B-a-10		FC1=CC=C2C(C=C(NC(NC(C3=C(C)C=CC(Br)=C3)C(S3)=CC=C3C3=CC=C(F)C=C3)=O)C=N2)=C1	7.89185	2	2	5	564.45	54.02
De-B-a-11		O=C(NC1=CC2=C(CCNC2)N=C1)NC(C1=C(C)C=CC(Br)=C1)C(S1)=CC=C1C1=CC=C(F)C=C1	6.00188	3	3	5	551.48	66.05
De-B-a-12		O=C(NC1=CC=CC(N2N=CC=N2)=C1)NC(C1=C(C)C=CC(Br)=C1)C(S1)=CC=C1C1=CC=C(F)C=C1	6.7791	2	3	6	562.46	71.84
De-B-b-1		O=C(NC%20=C(N)C=CC=C%20)C%21=CC=C(NC(NC(C%22=C(C)C=CC(Br)=C%22)C(S%23)=CC=C%23C%24=CC=C(F)C=C%24)=O)C=C%21	7.85445	4	3	7	629.55	96.25
De-B-b-2		O=C(NC%61=CC=CC%62=CN=CC=C%62%61)NC(C%63=C(C)C=CC(Br)=C%63)C(S%64)=CC=C%64C%65=CC=C(F)C=C%65	7.36329	2	2	5	546.46	54.02
De-B-b-3		CC(C)N%96N=CC%97=CC(NC(NC(C%98=C(C)C=CC(Br)=C%98)C(S%99)=CC=C%99C1=CC=C(F)C=C1)=O)=CC=C%97%96	7.81161	2	2	6	577.52	58.95
De-B-b-4		ClC1=NC=C(C=CC=C2NC(NC(C3=C(C)C=CC(Br)=C3)C(S3)=CC=C3C3=CC=C(F)C=C3)=O)C2=C1	8.18751	2	2	5	580.9	54.02
De-B-b-5		BrC1=CC(NC(NC(C2=C(C)C=CC(Br)=C2)C(S2)=CC=C2C2=CC=C(F)C=C2)=O)=CC(C2CC2)=C1	9.14152	2	1	6	614.37	41.13
De-B-b-6		NC1=NC=CC2=CC(NC(NC(C3=C(C)C=CC(Br)=C3)C(S4)=CC=C4C5=CC=C(F)C=C5)=O)=CC=C21	7.12882	3	3	5	561.47	80.04
De-B-b-7		CC(CC1(C)C)(C)C2=C1C([N+]([O-])=O)=C(C)C(NC(NC(C1=CC=C(C3=CC=C(C=C3)F)S1)C(C=C(C=C1)Br)=C1C)=O)=C2	10.2267	2	3	6	650.61	84.27
De-B-b-8		O=S(CCN1C2=CC=C(NC(NC(C3=C(C)C=CC(Br)=C3)C(S3)=CC=C3C3=CC=C(F)C=C3)=O)C=C2)(CC1)=O	6.35989	2	4	6	628.58	78.51
De-B-b-9		O=C(OCC)C1=CC2=CC(OC)=C(NC(NC(C3=C(C)C=CC(Br)=C3)C(S3)=CC=C3C3=CC=C(F)C=C3)=O)C=C2N1	7.81287	3	3	9	636.54	92.45
De-B-b-10		ClC1=CC2=C(SC=C2NC(NC(C2=C(C)C=CC(Br)=C2)C(S2)=CC=C2C2=CC=C(F)C=C2)=O)C=C1	9.07156	2	1	5	585.93	41.13
De-B-b-11		O=S1(N(CCCC1)C1=CC(F)=C(NC(NC(C2=C(C)C=CC(Br)=C2)C(S2)=CC=C2C2=CC=C(F)C=C2)=O)C=C1)=O	6.88899	2	3	6	646.57	78.51
De-B-b-12		O=C(NC1=CN=CC2=CC=CC=C21)NC(C1=C(C)C=CC(Br)=C1)C(S1)=CC=C1C1=CC=C(F)C=C1	7.36329	2	2	5	546.46	54.02
De-B-c-1		O=C(NC%25=C(C=NC=C%26)C%26=CC=C%25)NC(C%27=C(C)C=CC(Br)=C%27)C(S%28)=CC=C%28C%29=CC=C(F)C=C%29	7.36329	2	2	5	546.46	54.02
De-B-c-2		ClC%66=NC(Cl)=CC(NC(NC(C%67=C(C)C=CC(Br)=C%67)C(S%68)=CC=C%68C%69=CC=C(F)C=C%69)=O)=C%66N	7.19333	3	3	5	580.3	80.04
De-B-c-3		O=C(NC(C=N1)=CC=C1OCCN1CCCCC1)NC(C1=C(C)C=CC(Br)=C1)C(S1)=CC=C1C1=CC=C(F)C=C1	7.67961	2	4	9	623.59	66.49
De-B-c-4		N#CC1(CCCCC1)C1=CC=C(NC(NC(C2=C(C)C=CC(Br)=C2)C(S2)=CC=C2C2=CC=C(F)C=C2)=O)C=C1	9.25617	2	2	6	602.57	64.92
De-B-c-5		O=C1N(CCOC)N=NC2=C1C=C(NC(NC(C1=C(C)C=CC(Br)=C1)C(S1)=CC=C1C1=CC=C(F)C=C1)=O)C=C2	7.58393	2	5	8	622.51	95.39
De-B-c-6		BrC1=CC=CC(C2=NC=C(NC(NC(C3=C(C)C=CC(Br)=C3)C(S3)=CC=C3C3=CC=C(F)C=C3)=O)C=N2)=C1	8.86611	2	3	6	652.38	66.91
De-B-c-7		O=C(NC1=CC=CN=C1C1=CC=CC=C1)NC(C1=C(C)C=CC(Br)=C1)C(S1)=CC=C1C1=CC=C(F)C=C1	8.40689	2	2	6	572.5	54.02
De-B-c-8		O=C1OCCN1C1=CC=CC=C1NC(NC(C1=C(C)C=CC(Br)=C1)C(S1)=CC=C1C1=CC=C(F)C=C1)=O	7.14103	2	3	6	580.47	70.67
De-B-c-9		CCOC(C1=C(C)N=C2N1C=CC=C2NC(NC(C1=C(C)C=CC(Br)=C1)C(S1)=CC=C1C1=CC=C(F)C=C1)=O)=O	6.78945	2	3	8	621.53	84.73
De-B-c-10		FC1=CC(NC(NC(C2=C(C)C=CC(Br)=C2)C(S2)=CC=C2C2=CC=C(F)C=C2)=O)=CC(F)=C1C1CC1	8.65818	2	1	6	571.46	41.13
De-B-c-11		O=C(O)C1CCC2=C1C=CC=C2NC(NC(C1=C(C)C=CC(Br)=C1)C(S1)=CC=C1C1=CC=C(F)C=C1)=O	7.82192	3	3	6	579.48	78.43
De-B-c-12		CC1=CC(NC(NC(C2=C(C)C=CC(Br)=C2)C(S2)=CC=C2C2=CC=C(F)C=C2)=O)=CC(B2OC(C)(C)C(C)(C)O2)=C1	9.9437	2	3	6	635.4	59.59
De-B-d-1		CCOC(C(C)(C)OC%30=CC(NC(NC(C%31=C(C)C=CC(Br)=C%31)C(S%32)=CC=C%32C%33=CC=C(F)C=C%33)=O)=CC=C%30)=O	8.41603	2	3	10	625.55	76.66
De-B-d-2		O=C(NC%70=CN=C(C%71CCC%71)N=C%70)NC(C%72=C(C)C=CC(Br)=C%72)C(S%73)=CC=C%73C%74=CC=C(F)C=C%74	7.38646	2	3	6	551.48	66.91
De-B-d-3		CN(C)C(C1=C(C)C(C(OC)=O)=C(NC(NC(C2=CC=C(C3=CC=C(C=C3)F)S2)C(C=C(C=C2)Br)=C2C)=O)S1)=O	8.13526	2	3	8	644.57	87.74
De-B-d-4		CC(COC)OC1=CC=C(NC(NC(C2=C(C)C=CC(Br)=C2)C(S2)=CC=C2C2=CC=C(F)C=C2)=O)C=C1	7.80342	2	3	9	583.52	59.59
De-B-d-5		COC1=CC(NC(NC(C2=C(C)C=CC(Br)=C2)C(S2)=CC=C2C2=CC=C(F)C=C2)=O)=CC=C1	7.43382	2	2	6	525.44	50.36
De-B-d-6		BrC1=C(NC(NC(C2=C(C)C=CC(Br)=C2)C(S2)=CC=C2C2=CC=C(F)C=C2)=O)C(OC)=CC=C1C(F)(F)F	9.08042	2	2	7	672.33	50.36
De-B-d-7		O=C(NC1=CC(C(F)(F)F)=CC(C(F)(F)F)=C1)NC(C1=C(C)C=CC(Br)=C1)C(S1)=CC=C1C1=CC=C(F)C=C1	9.34719	2	1	7	631.41	41.13
De-B-d-8		CC1=C(OC)C=CC(CCNC(NC(C2=C(C)C=CC(Br)=C2)C(S2)=CC=C2C2=CC=C(F)C=C2)=O)=C1	7.9428	2	2	8	567.52	50.36
De-B-d-9		O=C(N(C1)CC1N1CCNCC1)NC(C1=C(C)C=CC(Br)=C1)C(S1)=CC=C1C1=CC=C(F)C=C1	5.16855	2	3	5	543.5	47.61
De-B-d-10		O=C(N1CCCC21CCC1=C2C=C(N2CCOCC2)C=C1)NC(C1=C(C)C=CC(Br)=C1)C(S1)=CC=C1C1=CC=C(F)C=C1	8.2854	1	3	5	660.65	44.81
De-B-d-11		CN1[C@@]2([H])C[C@@H](NC(NC(C3=C(C)C=CC(Br)=C3)C(S3)=CC=C3C3=CC=C(F)C=C3)=O)C[C@]1([H])CCC2	6.57063	2	2	5	556.54	44.37
De-B-d-12		O=C(N1CCCC(C2CCNCC2)C1)NC(C1=C(C)C=CC(Br)=C1)C(S1)=CC=C1C1=CC=C(F)C=C1	6.60458	2	2	5	570.57	44.37
De-B-e-1		O=C(N(CC%34)CCC%35%34OC%36=CC=CC=C%36O%35)NC(C%37=C(C)C=CC(Br)=C%37)C(S%38)=CC=C%38C%39=CC=C(F)C=C%39	8.04172	1	3	4	593.51	50.8
De-B-e-2		[H][C@]12[C@](CN(C(NC(C3=C(C)C=CC(Br)=C3)C(S4)=CC=C4C5=CC=C(F)C=C5)=O)[C@H](C(NC(C)(C)C)=O)C2)([H])CCCC1	7.886	2	2	6	640.66	61.44
De-B-e-3		COC(C(OC)=C1)=CC2=C1CCN(C2)C1CCN(C(NC(C2=C(C)C=CC(Br)=C2)C(S2)=CC=C2C2=CC=C(F)C=C2)=O)CC1	7.27342	1	4	7	678.66	54.04
De-B-e-4		NCCCCCCCCCCNC(NC(C1=C(C)C=CC(Br)=C1)C(S1)=CC=C1C1=CC=C(F)C=C1)=O	8.02167	3	2	14	574.6	67.15
De-B-e-5		O=C(NCCCC(F)(F)F)NC(C1=C(C)C=CC(Br)=C1)C(S1)=CC=C1C1=CC=C(F)C=C1	7.08798	2	1	8	529.39	41.13
De-B-e-6		O=C(N(CC1)CCC1CCCC1=CC=CC=C1)NC(C1=C(C)C=CC(Br)=C1)C(S1)=CC=C1C1=CC=C(F)C=C1	9.40249	1	1	8	605.61	32.34
De-B-e-7		ClC1=CN=C(C2CN(C(NC(C3=C(C)C=CC(Br)=C3)C(S3)=CC=C3C3=CC=C(F)C=C3)=O)C2)N=C1	6.67377	1	3	5	571.89	58.12
De-B-e-8		[H][C@@]12[C@@](CN(C(NC(C3=C(C)C=CC(Br)=C3)C(S3)=CC=C3C3=CC=C(F)C=C3)=O)C2)([H])CNCC1	5.39038	2	2	4	528.48	44.37
De-B-e-9		NCC1CCCCN1C(NC(C1=C(C)C=CC(Br)=C1)C(S1)=CC=C1C1=CC=C(F)C=C1)=O	5.91075	2	2	5	516.47	58.36
De-B-e-10		O=C(N(CCCC1)C1C1=NC2=CC=CC=C2S1)NC(C1=C(C)C=CC(Br)=C1)C(S1)=CC=C1C1=CC=C(F)C=C1	8.79778	1	2	5	620.6	45.23
De-B-e-11		NCC1CN(C2CCN(C(NC(C3=C(C)C=CC(Br)=C3)C(S3)=CC=C3C3=CC=C(F)C=C3)=O)CC2)C1	4.90968	2	3	6	571.55	61.6
De-B-e-12		O=C(NCC1(C2=CC=CC=C2)CCOCC1)NC(C1=C(C)C=CC(Br)=C1)C(S1)=CC=C1C1=CC=C(F)C=C1	7.50751	2	2	7	593.56	50.36
De-B-f-1		O=C(N%40CCCC%40CN%41CCCCCC%41)NC(C%42=C(C)C=CC(Br)=C%42)C(S%43)=CC=C%43C%44=CC=C(F)C=C%44	7.57674	1	2	6	584.59	35.58
De-B-f-2		CN(C)CC(C=C%80)=CC=C%80C%81CCCN%81C(NC(C%82=C(C)C=CC(Br)=C%82)C(S%83)=CC=C%83C%84=CC=C(F)C=C%84)=O	7.92903	1	2	7	606.6	35.58
De-B-f-3		NC1(CNC(NC(C2=C(C)C=CC(Br)=C2)C(S2)=CC=C2C2=CC=C(F)C=C2)=O)CCOCC1	4.66189	3	3	6	532.47	76.38
De-B-f-4		CC(N)C1CCN(C(NC(C2=C(C)C=CC(Br)=C2)C(S2)=CC=C2C2=CC=C(F)C=C2)=O)C1	5.48294	2	2	5	516.47	58.36
De-B-f-5		ClC1=CC=CC=C1N1CC2(CCN(C(NC(C3=C(C)C=CC(Br)=C3)C(S3)=CC=C3C3=CC=C(F)C=C3)=O)C2)CC1	8.39597	1	2	5	639.02	35.58
De-B-f-6		[H][C@@]12NC[C@@](C2)([H])N(C(NC(C2=C(C)C=CC(Br)=C2)C(S2)=CC=C2C2=CC=C(F)C=C2)=O)C1	5.26964	2	2	4	500.43	44.37
De-B-f-7		CC1=NOC(C)=C1CCNC(NC(C1=C(C)C=CC(Br)=C1)C(S1)=CC=C1C1=CC=C(F)C=C1)=O	6.28253	2	2	7	542.47	67.16
De-B-f-8		CC1(C)[C@@]2([H])CC[C@@H](CNC(NC(C3=C(C)C=CC(Br)=C3)C(S3)=CC=C3C3=CC=C(F)C=C3)=O)[C@@]1(C2)[H]	7.94101	2	1	6	555.55	41.13
De-B-f-9		CC(NC(NC(C1=C(C)C=CC(Br)=C1)C(S1)=CC=C1C1=CC=C(F)C=C1)=O)C1=CC=C(F)C=N1	6.87366	2	2	6	542.44	54.02
De-B-f-10		O=C1C2(CCCN(C(NC(C3=C(C)C=CC(Br)=C3)C(S3)=CC=C3C3=CC=C(F)C=C3)=O)C2)CC2=CC=CC=C21	7.94199	1	2	4	603.55	49.41
De-B-f-11		O=C(NCC1(CCNCC1)C1=CC=CC=C1)NC(C1=C(C)C=CC(Br)=C1)C(S1)=CC=C1C1=CC=C(F)C=C1	7.19008	3	2	7	592.57	53.16
De-B-f-12		CC(CNC(NC(C1=C(C)C=CC(Br)=C1)C(S1)=CC=C1C1=CC=C(F)C=C1)=O)CC1=CC=CC=N1	7.05284	2	2	8	552.51	54.02
De-B-g-1		O=C%45OCC%46(CCN(C(NC(C%47=C(C)C=CC(Br)=C%47)C(S%48)=CC=C%48C%49=CC=C(F)C=C%49)=O)CC%46)CN%45	5.52332	2	2	4	572.49	70.67
De-B-g-2		COCCNCCNC(NC(C%85=C(C)C=CC(Br)=C%85)C(S%86)=CC=C%86C%87=CC=C(F)C=C%87)=O	5.16254	3	3	10	520.46	62.39
De-B-g-3		O=C(N1CC2(CC2)C2(OCCO2)C1)NC(C1=C(C)C=CC(Br)=C1)C(S1)=CC=C1C1=CC=C(F)C=C1	6.48869	1	3	4	557.48	50.8
De-B-g-4		NC1[C@]2([H])CN(C(NC(C3=C(C)C=CC(Br)=C3)C(S3)=CC=C3C3=CC=C(F)C=C3)=O)C[C@@]21[H]	4.61456	2	2	4	500.43	58.36
De-B-g-5		C[C@@H](N)CNC(NC(C1=C(C)C=CC(Br)=C1)C(S1)=CC=C1C1=CC=C(F)C=C1)=O	5.19351	3	2	6	476.41	67.15
De-B-g-6		C/C(CC/C=C(C)/C)=C\CNC(NC(C1=C(C)C=CC(Br)=C1)C(S1)=CC=C1C1=CC=C(F)C=C1)=O	8.59488	2	1	9	555.55	41.13
De-B-g-7		NCCOCCNC(NC(C1=C(C)C=CC(Br)=C1)C(S1)=CC=C1C1=CC=C(F)C=C1)=O	4.72996	3	3	9	506.43	76.38
De-B-g-8		O=C(N1CCC2(CCN2)CC1)NC(C1=C(C)C=CC(Br)=C1)C(S1)=CC=C1C1=CC=C(F)C=C1	5.25356	2	2	4	528.48	44.37
De-B-g-9		CN1CC2CCCC(C1)N2C(NC(C1=C(C)C=CC(Br)=C1)C(S1)=CC=C1C1=CC=C(F)C=C1)=O	6.61462	1	2	4	542.51	35.58
De-B-g-10		[H][C@]1(N2C(NC(C3=C(C)C=CC(Br)=C3)C(S3)=CC=C3C3=CC=C(F)C=C3)=O)[C@]2([H])CNC1	5.20968	2	2	4	486.4	44.14
De-B-g-11		[H][C@]12NCC[C@@]1([H])CCN(C(NC(C1=C(C)C=CC(Br)=C1)C(S1)=CC=C1C1=CC=C(F)C=C1)=O)C2	5.7902	2	2	4	528.48	44.37
De-B-g-12		FC1=C(C2(CNC(NC(C3=C(C)C=CC(Br)=C3)C(S3)=CC=C3C3=CC=C(F)C=C3)=O)CCC2)C(F)=CC=C1	8.59627	2	1	7	599.51	41.13
De-B-h-1		O=C%50C%51=CC=CC=C%51OC%52(CCN(C(NC(C%53=C(C)C=CC(Br)=C%53)C(S%54)=CC=C%54C%55=CC=C(F)C=C%55)=O)CC%52)N%50	7.2737	2	3	4	620.54	70.67
De-B-h-2		COC[C@H]%88N(C(NC(C%89=C(C)C=CC(Br)=C%89)C(S%90)=CC=C%90C%91=CC=C(F)C=C%91)=O)[C@H](COC)CC%88	6.22898	1	3	8	561.51	50.8
De-B-h-3		[H][C@@]12[C@@](CCN(C(NC(C3=C(C)C=CC(Br)=C3)C(S3)=CC=C3C3=CC=C(F)C=C3)=O)C2)([H])CCCC1	7.72537	1	1	4	541.52	32.34
De-B-h-4		O=C(N1CC(CC2=CC(OCO3)=C3C=C2)CCC1)NC(C1=C(C)C=CC(Br)=C1)C(S1)=CC=C1C1=CC=C(F)C=C1	8.21454	1	3	6	621.57	50.8
De-B-h-5		NC[C@H]1CCN(C(NC(C2=C(C)C=CC(Br)=C2)C(S2)=CC=C2C2=CC=C(F)C=C2)=O)C1	5.06636	2	2	5	502.45	58.36
De-B-h-6		COC(C=CC=C1CNC(NC(C2=C(C)C=CC(Br)=C2)C(S2)=CC=C2C2=CC=C(F)C=C2)=O)=C1OC1CCCC1	8.33775	2	3	9	623.58	59.59
De-B-h-7		O=S(CCC1(CNC(NC(C2=C(C)C=CC(Br)=C2)C(S2)=CC=C2C2=CC=C(F)C=C2)=O)N2CCOCC2)(CC1)=O	4.13788	2	5	7	650.62	87.74
De-B-h-8		O=C(N(CC1)CCC21COC1=CC=CC=C12)NC(C1=C(C)C=CC(Br)=C1)C(S1)=CC=C1C1=CC=C(F)C=C1	7.44897	1	2	4	591.54	41.57
De-B-h-9		O=S(N(C1CC1)C1CCN(C(NC(C2=C(C)C=CC(Br)=C2)C(S2)=CC=C2C2=CC=C(F)C=C2)=O)CC1)(C1=CC=C(Cl)C=C1)=O	7.73047	1	3	7	717.11	69.72
De-B-h-10		BrC1=CC=C(C2(NC(NC(C3=C(C)C=CC(Br)=C3)C(S3)=CC=C3C3=CC=C(F)C=C3)=O)CCC2)C=C1	8.90105	2	1	6	628.4	41.13
De-B-h-11		O=C6C7=CC(C(NC[C@@H](C(O)=O)NS(C8=CC=C(C)C=C8)(=O)=O)=O)=NN7CCCN6CCC9CCN(C(NC(C%10=C(C)C=CC(Br)=C%10)C(S%11)=CC=C%11C%12=CC=C(F)C=C%12)=O)CC9	6.26394	4	8	13	948.92	183.04
De-B-h-12		CCC(N(C1=CC=CC=C1)C1CCN(C(NC(C2=C(C)C=CC(Br)=C2)C(S2)=CC=C2C2=CC=C(F)C=C2)=O)CC1)=O	7.40979	1	2	7	634.61	52.65
De-C-a-1		O=C%11[C@@]%12(CC(C=CC(NC(NC(CCCC)C(C=C%13)=CC=C%13OC(C%14=CC=C(OC)C=C%14)=O)=O)=C%15)=C%15C%12)C%16=CC=CN=C%16N%11	6.91565	3	5	10	590.68	118.65
De-C-a-2		O=S%46(C%47=CC(NC(NC(CCCC)C(C=C%48)=CC=C%48OC(C%49=CC=C(OC)C=C%49)=O)=O)=CC=C%47OCC%46)=O	4.82086	2	6	10	538.62	120.03
De-C-a-3		NC%74=C(NC(NC(CCCC)C(C=C%75)=CC=C%75OC(C%76=CC=C(OC)C=C%76)=O)=O)C=C(OC(F)(F)F)C=C%74	6.75974	3	5	12	531.532	111.91
De-C-a-4		BrC1=CN(C(NC(CCCC)C(C=C2)=CC=C2OC(C2=CC=C(OC)C=C2)=O)=O)C2=C1C=CN=C2	5.8895	1	4	9	536.426	82.45
De-C-a-5		O=C(C1=CC(NC(NC(CCCC)C(C=C2)=CC=C2OC(C2=CC=C(OC)C=C2)=O)=O)=CC=C1)NCC1=NC=CC=C1	5.82015	3	5	13	566.658	118.65
De-C-a-6		NC1=C(NC(NC(CCCC)C(C=C2)=CC=C2OC(C2=CC=C(OC)C=C2)=O)=O)C=C(N2C=CC=C2)C=C1	6.29015	3	4	11	512.61	107.61
De-C-a-7		ClC1=CC(NC(NC(CCCC)C(C=C2)=CC=C2OC(C2=CC=C(OC)C=C2)=O)=O)=C(N)C=C1N(C)C	6.04072	3	5	11	525.05	105.92
De-C-a-8		CC1=CC(C)=NN1C1=CC=CC=C1NC(NC(CCCC)C(C=C1)=CC=C1OC(C1=CC=C(OC)C=C1)=O)=O	6.57431	2	4	11	526.637	94.48
De-C-a-9		CCC1=NOC(C2=CC(NC(NC(CCCC)C(C=C3)=CC=C3OC(C3=CC=C(OC)C=C3)=O)=O)=CC=C2)=N1	7.28214	2	5	12	528.609	115.58
De-C-a-10		FC1=CC=C2C(C=C(NC(NC(CCCC)C(C=C3)=CC=C3OC(C3=CC=C(OC)C=C3)=O)=O)C=N2)=C1	6.45792	2	4	10	501.558	89.55
De-C-a-11		O=C(OC1=CC=C(C(NC(NC2=CC3=C(CCNC3)N=C2)=O)CCCC)C=C1)C1=CC=C(OC)C=C1	4.56795	3	5	10	488.588	101.58
De-C-a-12		O=C(OC1=CC=C(C(NC(NC2=CC=CC(N3N=CC=N3)=C2)=O)CCCC)C=C1)C1=CC=C(OC)C=C1	5.5313	2	5	11	499.571	107.37
De-C-b-1		O=C(NC%17=C(N)C=CC=C%17)C%18=CC=C(NC(NC(CCCC)C(C=C%19)=CC=C%19OC(C%20=CC=C(OC)C=C%20)=O)=O)C=C%18	6.42052	4	5	12	566.658	131.78
De-C-b-2		O=C(OC%50=CC=C(C(NC(NC%51=CC=CC%52=CN=CC=C%52%51)=O)CCCC)C=C%50)C%53=CC=C(OC)C=C%53	5.92936	2	4	10	483.568	89.55
De-C-b-3		CC(C)N%77N=CC%78=CC(NC(NC(CCCC)C(C=C%79)=CC=C%79OC(C%80=CC=C(OC)C=C%80)=O)=O)=CC=C%78%77	6.37768	2	4	11	514.626	94.48
De-C-b-4		ClC1=NC=C(C=CC=C2NC(NC(CCCC)C(C=C3)=CC=C3OC(C3=CC=C(OC)C=C3)=O)=O)C2=C1	6.75358	2	4	10	518.01	89.55
De-C-b-5		BrC1=CC(NC(NC(CCCC)C(C=C2)=CC=C2OC(C2=CC=C(OC)C=C2)=O)=O)=CC(C2CC2)=C1	7.70759	2	3	11	551.481	76.66
De-C-b-6		NC1=NC=CC2=CC(NC(NC(CCCC)C(C=C3)=CC=C3OC(C4=CC=C(OC)C=C4)=O)=O)=CC=C21	5.69489	3	5	10	498.583	115.57
De-C-b-7		CC(CC1(C)C)(C)C2=C1C([N+]([O-])=O)=C(C)C(NC(NC(CCCC)C(C=C1)=CC=C1OC(C1=CC=C(OC)C=C1)=O)=O)=C2	8.79278	2	5	11	587.717	119.8
De-C-b-8		O=S(CCN1C2=CC=C(NC(NC(CCCC)C(C=C3)=CC=C3OC(C3=CC=C(OC)C=C3)=O)=O)C=C2)(CC1)=O	4.92596	2	6	11	565.69	114.04
De-C-b-9		O=C(OCC)C1=CC2=CC(OC)=C(NC(NC(CCCC)C(C=C3)=CC=C3OC(C3=CC=C(OC)C=C3)=O)=O)C=C2N1	6.37894	3	5	14	573.646	127.98
De-C-b-10		ClC1=CC2=C(SC=C2NC(NC(CCCC)C(C=C2)=CC=C2OC(C2=CC=C(OC)C=C2)=O)=O)C=C1	7.63763	2	3	10	523.04	76.66
De-C-b-11		O=S1(N(CCCC1)C1=CC(F)=C(NC(NC(CCCC)C(C=C2)=CC=C2OC(C2=CC=C(OC)C=C2)=O)=O)C=C1)=O	5.45506	2	5	11	583.68	114.04
De-C-b-12		O=C(OC1=CC=C(C(NC(NC2=CN=CC3=CC=CC=C32)=O)CCCC)C=C1)C1=CC=C(OC)C=C1	5.92936	2	4	10	483.568	89.55
De-C-c-1		O=C(OC%21=CC=C(C(NC(NC%22=C(C=NC=C%23)C%23=CC=C%22)=O)CCCC)C=C%21)C%24=CC=C(OC)C=C%24	5.92936	2	4	10	483.568	89.55
De-C-c-2		ClC%54=NC(Cl)=CC(NC(NC(CCCC)C(C=C%55)=CC=C%55OC(C%56=CC=C(OC)C=C%56)=O)=O)=C%54N	5.7594	3	5	10	517.41	115.57
De-C-c-3		O=C(OC%81=CC=C(C(NC(NC(C=N%82)=CC=C%82OCCN%83CCCCC%83)=O)CCCC)C=C%81)C%84=CC=C(OC)C=C%84	6.24568	2	6	14	560.695	102.02
De-C-c-4		N#CC1(CCCCC1)C1=CC=C(NC(NC(CCCC)C(C=C2)=CC=C2OC(C2=CC=C(OC)C=C2)=O)=O)C=C1	7.82224	2	4	11	539.676	100.45
De-C-c-5		O=C1N(CCOC)N=NC2=C1C=C(NC(NC(CCCC)C(C=C1)=CC=C1OC(C1=CC=C(OC)C=C1)=O)=O)C=C2	6.15	2	7	13	559.623	130.92
De-C-c-6		BrC1=CC=CC(C2=NC=C(NC(NC(CCCC)C(C=C3)=CC=C3OC(C3=CC=C(OC)C=C3)=O)=O)C=N2)=C1	7.446	2	5	11	589.49	102.44
De-C-c-7		O=C(OC1=CC=C(C(NC(NC2=CC=CN=C2C2=CC=CC=C2)=O)CCCC)C=C1)C1=CC=C(OC)C=C1	6.97296	2	4	11	509.606	89.55
De-C-c-8		O=C1OCCN1C1=CC=CC=C1NC(NC(CCCC)C(C=C1)=CC=C1OC(C1=CC=C(OC)C=C1)=O)=O	5.7071	2	5	11	517.582	106.2
De-C-c-9		CCOC(C1=C(C)N=C2N1C=CC=C2NC(NC(CCCC)C(C=C1)=CC=C1OC(C1=CC=C(OC)C=C1)=O)=O)=O	5.35552	2	5	13	558.635	120.26
De-C-c-10		FC1=CC(NC(NC(CCCC)C(C=C2)=CC=C2OC(C2=CC=C(OC)C=C2)=O)=O)=CC(F)=C1C1CC1	7.22425	2	3	11	508.566	76.66
De-C-c-11		O=C(O)C1CCC2=C1C=CC=C2NC(NC(CCCC)C(C=C1)=CC=C1OC(C1=CC=C(OC)C=C1)=O)=O	6.38799	3	5	11	516.594	113.96
De-C-c-12		CC1=CC(NC(NC(CCCC)C(C=C2)=CC=C2OC(C2=CC=C(OC)C=C2)=O)=O)=CC(B2OC(C)(C)C(C)(C)O2)=C1	8.6959	2	5	11	572.51	95.12
De-C-d-1		CCOC(C(C)(C)OC%25=CC(NC(NC(CCCC)C(C=C%26)=CC=C%26OC(C%27=CC=C(OC)C=C%27)=O)=O)=CC=C%25)=O	6.9821	2	5	15	562.663	112.19
De-C-d-2		O=C(OC%57=CC=C(C(NC(NC%58=CN=C(C%59CCC%59)N=C%58)=O)CCCC)C=C%57)C%60=CC=C(OC)C=C%60	5.96635	2	5	11	488.588	102.44
De-C-d-3		CN(C)C(C%85=C(C)C(C(OC)=O)=C(NC(NC(CCCC)C(C=C%86)=CC=C%86OC(C%87=CC=C(OC)C=C%87)=O)=O)S%85)=O	6.70133	2	5	13	581.68	123.27
De-C-d-4		CC(COC)OC1=CC=C(NC(NC(CCCC)C(C=C2)=CC=C2OC(C2=CC=C(OC)C=C2)=O)=O)C=C1	6.36949	2	5	14	520.626	95.12
De-C-d-5		COC1=CC(NC(NC(CCCC)C(C=C2)=CC=C2OC(C2=CC=C(OC)C=C2)=O)=O)=CC=C1	5.99989	2	4	11	462.546	85.89
De-C-d-6		BrC1=C(NC(NC(CCCC)C(C=C2)=CC=C2OC(C2=CC=C(OC)C=C2)=O)=O)C(OC)=CC=C1C(F)(F)F	7.64649	2	4	12	609.44	85.89
De-C-d-7		O=C(OC1=CC=C(C(NC(NC2=CC(C(F)(F)F)=CC(C(F)(F)F)=C2)=O)CCCC)C=C1)C1=CC=C(OC)C=C1	7.91326	2	3	12	568.516	76.66
De-C-d-8		CC1=C(OC)C=CC(CCNC(NC(CCCC)C(C=C2)=CC=C2OC(C2=CC=C(OC)C=C2)=O)=O)=C1	6.50887	2	4	13	504.627	85.89
De-C-d-9		O=C(OC1=CC=C(C(NC(N(C2)CC2N2CCNCC2)=O)CCCC)C=C1)C1=CC=C(OC)C=C1	3.73462	2	5	10	480.609	83.14
De-C-d-10		O=C(OC1=CC=C(C(NC(N2CCCC32CCC2=C3C=C(N3CCOCC3)C=C2)=O)CCCC)C=C1)C1=CC=C(OC)C=C1	6.85147	1	5	10	597.756	80.34
De-C-d-11		CN1[C@@]2([H])C[C@@H](NC(NC(CCCC)C(C=C3)=CC=C3OC(C3=CC=C(OC)C=C3)=O)=O)C[C@]1([H])CCC2	5.1367	2	4	10	493.648	79.9
De-C-d-12		O=C(OC1=CC=C(C(NC(N2CCCC(C3CCNCC3)C2)=O)CCCC)C=C1)C1=CC=C(OC)C=C1	5.17065	2	4	10	507.675	79.9
De-C-e-1		O=C(OC%28=CC=C(C(NC(N(CC%29)CCC%30%29OC%31=CC=CC=C%31O%30)=O)CCCC)C=C%28)C%32=CC=C(OC)C=C%32	6.60779	1	5	9	530.621	86.33
De-C-e-2		[H][C@]12[C@](CN(C(NC(CCCC)C(C=C3)=CC=C3OC(C4=CC=C(OC)C=C4)=O)=O)[C@H](C(NC(C)(C)C)=O)C2)([H])CCCC1	6.45207	2	4	11	577.766	96.97
De-C-e-3		COC(C(OC)=C%88)=CC%89=C%88CCN(C%89)C%90CCN(C(NC(CCCC)C(C=C%91)=CC=C%91OC(C%92=CC=C(OC)C=C%92)=O)=O)CC%90	5.83949	1	6	12	615.771	89.57
De-C-e-4		NCCCCCCCCCCNC(NC(CCCC)C(C=C1)=CC=C1OC(C1=CC=C(OC)C=C1)=O)=O	6.58774	3	4	19	511.707	102.68
De-C-e-5		O=C(OC1=CC=C(C(NC(NCCCC(F)(F)F)=O)CCCC)C=C1)C1=CC=C(OC)C=C1	5.65405	2	3	13	466.501	76.66
De-C-e-6		O=C(OC1=CC=C(C(NC(N(CC2)CCC2CCCC2=CC=CC=C2)=O)CCCC)C=C1)C1=CC=C(OC)C=C1	7.96856	1	3	13	542.72	67.87
De-C-e-7		ClC1=CN=C(C2CN(C(NC(CCCC)C(C=C3)=CC=C3OC(C3=CC=C(OC)C=C3)=O)=O)C2)N=C1	5.25365	1	5	10	509	93.65
De-C-e-8		[H][C@@]12[C@@](CN(C(NC(CCCC)C(C=C3)=CC=C3OC(C3=CC=C(OC)C=C3)=O)=O)C2)([H])CNCC1	3.95645	2	4	9	465.594	79.9
De-C-e-9		NCC1CCCCN1C(NC(CCCC)C(C=C1)=CC=C1OC(C1=CC=C(OC)C=C1)=O)=O	4.47682	2	4	10	453.583	93.89
De-C-e-10		O=C(OC1=CC=C(C(NC(N(CCCC2)C2C2=NC3=CC=CC=C3S2)=O)CCCC)C=C1)C1=CC=C(OC)C=C1	7.36385	1	4	10	557.71	80.76
De-C-e-11		NCC1CN(C2CCN(C(NC(CCCC)C(C=C3)=CC=C3OC(C3=CC=C(OC)C=C3)=O)=O)CC2)C1	3.47575	2	5	11	508.663	97.13
De-C-e-12		O=C(OC1=CC=C(C(NC(NCC2(C3=CC=CC=C3)CCOCC2)=O)CCCC)C=C1)C1=CC=C(OC)C=C1	6.07358	2	4	12	530.665	85.89
De-C-f-1		O=C(OC%33=CC=C(C(NC(N%34CCCC%34CN%35CCCCCC%35)=O)CCCC)C=C%33)C%36=CC=C(OC)C=C%36	6.14281	1	4	11	521.702	71.11
De-C-f-2		CN(C)CC(C=C%65)=CC=C%65C%66CCCN%66C(NC(CCCC)C(C=C%67)=CC=C%67OC(C%68=CC=C(OC)C=C%68)=O)=O	6.4951	1	4	12	543.708	71.11
De-C-f-3		NC%93(CNC(NC(CCCC)C(C=C%94)=CC=C%94OC(C%95=CC=C(OC)C=C%95)=O)=O)CCOCC%93	3.22796	3	5	11	469.582	111.91
De-C-f-4		CC(N)C1CCN(C(NC(CCCC)C(C=C2)=CC=C2OC(C2=CC=C(OC)C=C2)=O)=O)C1	4.04901	2	4	10	453.583	93.89
De-C-f-5		ClC1=CC=CC=C1N1CC2(CCN(C(NC(CCCC)C(C=C3)=CC=C3OC(C3=CC=C(OC)C=C3)=O)=O)C2)CC1	6.96204	1	4	10	576.13	71.11
De-C-f-6		[H][C@@]12NC[C@@](C2)([H])N(C(NC(CCCC)C(C=C2)=CC=C2OC(C2=CC=C(OC)C=C2)=O)=O)C1	3.83571	2	4	9	437.54	79.9
De-C-f-7		CC1=NOC(C)=C1CCNC(NC(CCCC)C(C=C1)=CC=C1OC(C1=CC=C(OC)C=C1)=O)=O	4.8486	2	4	12	479.577	102.69
De-C-f-8		CC1(C)[C@@]2([H])CC[C@@H](CNC(NC(CCCC)C(C=C3)=CC=C3OC(C3=CC=C(OC)C=C3)=O)=O)[C@@]1(C2)[H]	6.50708	2	3	11	492.66	76.66
De-C-f-9		CC(NC(NC(CCCC)C(C=C1)=CC=C1OC(C1=CC=C(OC)C=C1)=O)=O)C1=CC=C(F)C=N1	5.43973	2	4	11	479.552	89.55
De-C-f-10		O=C1C2(CCCN(C(NC(CCCC)C(C=C3)=CC=C3OC(C3=CC=C(OC)C=C3)=O)=O)C2)CC2=CC=CC=C21	6.50806	1	4	9	540.66	84.94
De-C-f-11		O=C(OC1=CC=C(C(NC(NCC2(CCNCC2)C2=CC=CC=C2)=O)CCCC)C=C1)C1=CC=C(OC)C=C1	5.75615	3	4	12	529.681	88.69
De-C-f-12		CC(CNC(NC(CCCC)C(C=C1)=CC=C1OC(C1=CC=C(OC)C=C1)=O)=O)CC1=CC=CC=N1	5.61891	2	4	13	489.616	89.55
De-C-g-1		O=C%37OCC%38(CCN(C(NC(CCCC)C(C=C%39)=CC=C%39OC(C%40=CC=C(OC)C=C%40)=O)=O)CC%38)CN%37	4.08939	2	4	9	509.603	106.2
De-C-g-2		COCCNCCNC(NC(CCCC)C(C=C%69)=CC=C%69OC(C%70=CC=C(OC)C=C%70)=O)=O	3.72861	3	5	15	457.571	97.92
De-C-g-3		O=C(OC%96=CC=C(C(NC(N%97CC%98(CC%98)C%99(OCCO%99)C%97)=O)CCCC)C=C%96)C1=CC=C(OC)C=C1	5.05476	1	5	9	494.588	86.33
De-C-g-4		NC1[C@]2([H])CN(C(NC(CCCC)C(C=C3)=CC=C3OC(C3=CC=C(OC)C=C3)=O)=O)C[C@@]21[H]	3.18063	2	4	9	437.54	93.89
De-C-g-5		C[C@@H](N)CNC(NC(CCCC)C(C=C1)=CC=C1OC(C1=CC=C(OC)C=C1)=O)=O	3.75958	3	4	11	413.518	102.68
De-C-g-6		C/C(CC/C=C(C)/C)=C\CNC(NC(CCCC)C(C=C1)=CC=C1OC(C1=CC=C(OC)C=C1)=O)=O	7.16095	2	3	14	492.66	76.66
De-C-g-7		NCCOCCNC(NC(CCCC)C(C=C1)=CC=C1OC(C1=CC=C(OC)C=C1)=O)=O	3.29603	3	5	14	443.544	111.91
De-C-g-8		O=C(OC1=CC=C(C(NC(N2CCC3(CCN3)CC2)=O)CCCC)C=C1)C1=CC=C(OC)C=C1	3.81963	2	4	9	465.594	79.9
De-C-g-9		CN1CC2CCCC(C1)N2C(NC(CCCC)C(C=C1)=CC=C1OC(C1=CC=C(OC)C=C1)=O)=O	5.18069	1	4	9	479.621	71.11
De-C-g-10		[H][C@]1(N2C(NC(CCCC)C(C=C3)=CC=C3OC(C3=CC=C(OC)C=C3)=O)=O)[C@]2([H])CNC1	3.77575	2	4	9	423.513	79.67
De-C-g-11		[H][C@]12NCC[C@@]1([H])CCN(C(NC(CCCC)C(C=C1)=CC=C1OC(C1=CC=C(OC)C=C1)=O)=O)C2	4.35627	2	4	9	465.594	79.9
De-C-g-12		FC1=C(C2(CNC(NC(CCCC)C(C=C3)=CC=C3OC(C3=CC=C(OC)C=C3)=O)=O)CCC2)C(F)=CC=C1	7.16234	2	3	12	536.62	76.66
De-C-h-1		O=C%41C%42=CC=CC=C%42OC%43(CCN(C(NC(CCCC)C(C=C%44)=CC=C%44OC(C%45=CC=C(OC)C=C%45)=O)=O)CC%43)N%41	5.83977	2	5	9	557.647	106.2
De-C-h-2		COC[C@H]%71N(C(NC(CCCC)C(C=C%72)=CC=C%72OC(C%73=CC=C(OC)C=C%73)=O)=O)[C@H](COC)CC%71	4.79505	1	5	13	498.62	86.33
De-C-h-3		[H][C@@]12[C@@](CCN(C(NC(CCCC)C(C=C3)=CC=C3OC(C3=CC=C(OC)C=C3)=O)=O)C2)([H])CCCC1	6.29144	1	3	9	478.633	67.87
De-C-h-4		O=C(OC1=CC=C(C(NC(N2CC(CC3=CC(OCO4)=C4C=C3)CCC2)=O)CCCC)C=C1)C1=CC=C(OC)C=C1	6.78061	1	5	11	558.675	86.33
De-C-h-5		NC[C@H]1CCN(C(NC(CCCC)C(C=C2)=CC=C2OC(C2=CC=C(OC)C=C2)=O)=O)C1	3.63243	2	4	10	439.556	93.89
De-C-h-6		COC(C=CC=C1CNC(NC(CCCC)C(C=C2)=CC=C2OC(C2=CC=C(OC)C=C2)=O)=O)=C1OC1CCCC1	6.90382	2	5	14	560.691	95.12
De-C-h-7		O=S(CCC1(CNC(NC(CCCC)C(C=C2)=CC=C2OC(C2=CC=C(OC)C=C2)=O)=O)N2CCOCC2)(CC1)=O	2.70395	2	7	12	587.73	123.27
De-C-h-8		O=C(OC1=CC=C(C(NC(N(CC2)CCC32COC2=CC=CC=C23)=O)CCCC)C=C1)C1=CC=C(OC)C=C1	6.01504	1	4	9	528.649	77.1
De-C-h-9		O=S(N(C1CC1)C1CCN(C(NC(CCCC)C(C=C2)=CC=C2OC(C2=CC=C(OC)C=C2)=O)=O)CC1)(C1=CC=C(Cl)C=C1)=O	6.29654	1	5	12	654.22	105.25
De-C-h-10		BrC1=CC=C(C2(NC(NC(CCCC)C(C=C3)=CC=C3OC(C3=CC=C(OC)C=C3)=O)=O)CCC2)C=C1	7.46712	2	3	11	565.508	76.66
De-C-h-11		O=C5C6=CC(C(NC[C@@H](C(O)=O)NS(C7=CC=C(C)C=C7)(=O)=O)=O)=NN6CCCN5CCC8CCN(C(NC(CCCC)C(C=C9)=CC=C9OC(C%10=CC=C(OC)C=C%10)=O)=O)CC8	4.83001	4	10	18	886.03	218.57
De-C-h-12		CCC(N(C1=CC=CC=C1)C1CCN(C(NC(CCCC)C(C=C2)=CC=C2OC(C2=CC=C(OC)C=C2)=O)=O)CC1)=O	5.97586	1	4	12	571.718	88.18
